# Supplementary material for: Relationship between sleep duration and hypertension in northeast China: a cross-sectional study
Source: PubMed Central journal article supplement — BMJ Open. 2019 Jan 21;9(1):e023916. doi: 10.1136/bmjopen-2018-023916 (PMC6347883; doi:10.1136/bmjopen-2018-023916), 2019-01-21
Supplement: bmjopen-2018-023916.draft_revisions.pdf [file bmjopen-2018-023916.draft_revisions.pdf]

# BMJ Open

BMJ Open is committed to open peer review. As part of this commitment we make the peer review history of every article we publish publicly available.

When an article is published we post the peer reviewers' comments and the authors' responses online. We also post the versions of the paper that were used during peer review. These are the versions that the peer review comments apply to.

The versions of the paper that follow are the versions that were submitted during the peer review process. They are not the versions of record or the final published versions. They should not be cited or distributed as the published version of this manuscript.

BMJ Open is an open access journal and the full, final, typeset and author-corrected version of record of the manuscript is available on our site with no access controls, subscription charges or pay-per-view fees (<http://bmjopen.bmj.com>).

If you have any questions on BMJ Open's open peer review process please email [info.bmjopen@bmj.com](mailto:info.bmjopen@bmj.com)

# BMJ Open

## Relationship between sleep duration and hypertension in Northeast China: a cross-sectional study

|                               |                                                                                                                                                                                                                                                                                                                                                                                                                                                                                                                                                                                 |
|-------------------------------|---------------------------------------------------------------------------------------------------------------------------------------------------------------------------------------------------------------------------------------------------------------------------------------------------------------------------------------------------------------------------------------------------------------------------------------------------------------------------------------------------------------------------------------------------------------------------------|
| Journal:                      | <i>BMJ Open</i>                                                                                                                                                                                                                                                                                                                                                                                                                                                                                                                                                                 |
| Manuscript ID                 | bmjopen-2018-023916                                                                                                                                                                                                                                                                                                                                                                                                                                                                                                                                                             |
| Article Type:                 | Research                                                                                                                                                                                                                                                                                                                                                                                                                                                                                                                                                                        |
| Date Submitted by the Author: | 02-May-2018                                                                                                                                                                                                                                                                                                                                                                                                                                                                                                                                                                     |
| Complete List of Authors:     | Li, Meng; Jilin University School of Public Health, Department of Epidemiology and Biostatistics<br>Yan, shoumeng; Jilin University School of Public Health, Department of Epidemiology and Biostatistics<br>Jiang, Shan; Jilin University School of Public Health, Department of Epidemiology and Biostatistics<br>Ma, Xiaoyu; Jilin University School of Public Health, Department of Epidemiology and Biostatistics<br>Gao, Tianyu; Jilin University School of Public Health, Department of Epidemiology and Biostatistics; Changchun Health Supervision Institute<br>Li, Bo |
| Keywords:                     | Hypertension < CARDIOLOGY, EPIDEMIOLOGY, sleep                                                                                                                                                                                                                                                                                                                                                                                                                                                                                                                                  |
|                               |                                                                                                                                                                                                                                                                                                                                                                                                                                                                                                                                                                                 |

SCHOLARONE™  
Manuscripts

# Relationship between sleep duration and hypertension in Northeast China: a cross-sectional study

Meng Li<sup>1</sup>, Shoumeng Yan<sup>1</sup>, Shan Jiang<sup>1</sup>, Xiaoyu Ma<sup>1</sup>, Tianyu Gao<sup>1,2</sup> and Bo Li<sup>1,\*</sup>

<sup>1</sup> Department of Epidemiology and Biostatistics, School of Public Health, Jilin University, Changchun 130021, China; E-Mails: lm17@mails.jlu.edu.cn (M.L.); yansm17@mails.jlu.edu.cn(S.Y.); jiangs17@mails.jlu.edu.cn(S.J.); maxy17@mails.jlu.edu.cn(X.M.);

<sup>2</sup> Changchun Health Supervision Institute, Changchun, 130000, China; E-Mail: gaoty17@mails.jlu.edu.cn (T.G.);

\* Correspondence to: Bo Li; Postal address: No.1163 Xinmin Street, Changchun City, Jilin Province, China. E-mail: li\_bo@jlu.edu.cn; Tel.: +86-431-85619451.

**Keywords:** sleep; hypertension; epidemiology;

**Word count:** 2704 words (excluding title page, references, figures and tables)

## Abstract

**Objectives:** Previous studies have reported that sleep duration might increase the risk of hypertension. However, the results have been conflicting. We investigated whether sleep duration is independently associated with hypertension. We aimed to assess the relationship between sleep duration and hypertension in a population-based cross-sectional study.

**Methods:** In this study, we used multistage stratified cluster sampling. A total of 19407 adults aged 18-79 years were enrolled. The participants were divided into three groups (<7hours/d, 7-8 hours/d, >8hours/d) according to self-reported sleep duration. Hypertension was defined as SBP $\geq$ 140mmHg or DBP $\geq$ 90mmHg or use of anti-hypertensive medications. Univariate and multivariate logistic regressions were performed to determine the association between hypertension and sleep duration adjusted for socio-demographic, BMI, and lifestyle covariates.

**Results:** The overall prevalence of hypertension was 32.6%. Among participants aged 18-44 years, individuals sleeping less than 7 hours per day had a higher risk of hypertension (OR=1.24, 95%CI: 1.05-1.46), compared with those who slept 7-8 hours per day. There were no significant associations between sleep duration and hypertension among the total sample, the middle aged (45-59 years), or the old (60-79 years).

**Conclusions:** Our study demonstrates that short sleep duration was significantly associated with hypertension among people aged 18-44 years in Northeast China.

## Article Summary

### Strengths and limitations of this study

This study is based on data from a large, representative sample of the Jilin population, and this prospective study minimized the selection and recall bias.

There are excellent response rates to the sleep duration questions and hypertension questions and measurements.

A broad range of covariates are controlled for in the analysis, including age, sex, education, marital status, income, occupation, BMI, drinking, smoking, diet habit, and exercise.

The limitation of this study lies in the properties of the cross-sectional study and the recall bias of all self-reported sleep duration.

## Introduction

In many countries, the diagnosis of hypertension is based on a systolic blood pressure (SBP) of at least 140 mmHg, a diastolic blood pressure (DBP) of at least 90 mmHg, or both<sup>1 2</sup>. In 2000, the overall prevalence of hypertension was 26.4% worldwide<sup>3</sup>. In 2010, hypertension was the leading single contributor to the global mortality, being responsible for more than 9 million deaths<sup>4</sup>. According to previous studies<sup>5 6</sup>, hypertension was a major risk factor for cardiovascular disease, sudden cardiac death, diabetes mellitus, the metabolic syndrome, chronic kidney disease, and Alzheimer disease. Epidemiologic studies have shown that sleep duration is associated with hypertension<sup>7 8</sup>. Short sleep duration, usually defined as less than 7h, 6h or 5h/night<sup>9</sup>, was associated with increased risk of prevalent hypertension<sup>10 11</sup>. The

1  
2  
3  
4 relationship between self-reported sleep duration and hypertension was first reported as a  
5 U-shaped association in the sleep heart health study(SHHS)<sup>12</sup>. In the study, Gottlieb et al.  
6 found that sleep duration less than 7h/night or more than 8h/night was associated with an  
7 increased prevalence of hypertension. The results from the nation health and nutrition  
8 examination survey(NHNES) also demonstrated an association between sleep durations less  
9 than 5 hours per night and increased risk of hypertension in the same year<sup>13</sup>. However, there  
10 are conflicting results. A community-based 7-site study<sup>14</sup> came to the conclusion that sleep  
11 duration was unrelated to blood pressure cross-sectionally or longitudinally in the midlife  
12 women. Similarly, a study among non-insomniac elderly subjects<sup>15</sup> indicated that sleep  
13 duration was not associated with the prevalence of hypertension. Therefore, the relationship  
14 between sleep duration and hypertension needs to be further investigated.

15  
16 In this study, we investigated the relationship between self-reported sleep duration and  
17 hypertension among subjects who participated in a representative population-based survey  
18 from Jilin province in northeast China. Moreover, the role of age and sex in the relationship  
19 between sleep duration and hypertension also was evaluated.

## 20 21 22 23 24 25 26 27 28 29 30 31 32 33 34 **Methods**

### 35 36 **Study design and population**

37 This study is embedded in the Jilin Provincial Chronic Disease Survey, a population-based  
38 cross-sectional study conducted from June 2012 to August 2012. Multistage stratified cluster  
39 sampling method was used to select a representative sample of community-dwelling residents  
40 who had lived in Jilin province within nine regions (Changchun, Jilin, Siping, Liaoyuan,  
41 Tonghua, Baishan, Songyuan, Baicheng and Yanbian) for at least six months. The detailed  
42 stratifying process was reported previously<sup>16</sup>. A total of 23050 individuals were recruited and  
43 21435 of them completed the survey (response rate 84.9%). In this study, 2028 subjects were  
44 excluded from the statistical analyses due to any missing data on marital status, occupation,  
45 income, height, weight, systolic blood pressure or diastolic blood pressure, yielding a final  
46 sample size of 19407 subjects. Among the 2028 excluded subjects(1218 male, 809 female),  
47  
48  
49  
50  
51  
52  
53  
54  
55  
56  
57  
58  
59  
60

1  
2  
3  
4  
5 the mean age was 47.07 years(SD 13.40, range 18-79).

6  
7 Ethical approval was obtained by the Ethics Committee of Jilin University School of  
8 Public Health. We adhered to the bioethics principles of the Declaration of Helsinki, and  
9 written informed consent was obtained from all participants.

### 10 11 **Definition of major variables**

12  
13 After at least 5 minutes of rest, two blood-pressure measurements were made with the  
14 participants in a seated position, using appropriately sized cuffs and calibrated electronic  
15 sphygmomanometers (OMRON-HEM-7200, Omron Corporation, Kyoto, Japan) The mean of  
16 the two blood pressure measurements taken at 2-minute intervals were used in the analyses.  
17 In our study, hypertension was defined as SBP $\geq$ 140 mmHg or DBP $\geq$ 90 mmHg or current  
18 use of anti-hypertensive medication.  
19

20  
21 Self-reported sleep duration was assessed by the following question: “On average, how  
22 many hours of actual sleep did you get each day(24h) during the past month?” The results  
23 were categorized into 3 groups for analysis: <7h/day, 7-8h/day,  $\geq$ 8h/day, and we choose the  
24 category of 7-8h/day as the reference group according to previous studies<sup>12</sup>.

25  
26 A structured questionnaire was used to collect socio-demographic information of the  
27 participants, and the characteristics included gender (male, female), age (18-44, 45-59, 60-79  
28 years), education (Elementary, Junior, Senior, University), marital status (married, unmarried,  
29 separated/divorced, widowed), occupation (manual labor, mental labor, unemployed, retired),  
30 family monthly income per capita (<1000, 1000-3000, >3000 RMB). The body mass index  
31 (BMI) was measured, calculated as weight (kg)/height squared ( $\text{kg}/\text{m}^2$ ). All participants were  
32 categorized as underweight (BMI<18.5 $\text{kg}/\text{m}^2$ ), normal weight (BMI=18.5 to 25 $\text{kg}/\text{m}^2$ ),  
33 overweight (BMI=25.0 to 30.0 $\text{kg}/\text{m}^2$ ) or obese (BMI>30.0 $\text{kg}/\text{m}^2$ )<sup>17</sup>. Other variables including  
34 smoking status(yes, no, former), drinking (yes, no), diet habit (high-salt, light, moderate),  
35 physical exercise (frequently, occasionally, never) were assessed. A smoker was defined as a  
36 person who had smoked at least one cigarette a day over the past 30 days; a former smoker  
37 was defined as a person who had smoked more than 100 cigarettes accumulatively but had  
38 quitted smoking or had not reached the current smoking level at the time of the survey;  
39  
40  
41  
42  
43  
44  
45  
46  
47  
48  
49  
50  
51  
52  
53  
54  
55  
56  
57  
58  
59  
60

1  
2  
3  
4 participants who reported never having smoked 100 cigarettes were defined as never-smokers.  
5  
6 Drinker was defined as a person who consumed an average of more than one alcoholic drink  
7  
8 per week. Based on self-report results, we divided the diet habits into three categories: high  
9  
10 salt, light and moderate. Participants who exercised more than three times a week were  
11  
12 defined as “exercise frequently”; those who exercised one or two times a week were defined  
13  
14 as “exercise occasionally”; while those who usually exercised less than one time a week were  
15  
16 defined as “never exercise”.

### 17 **Statistical analysis**

18  
19 Data were analysed using SPSS software (ver. 24.0; IBM Corp.: Armonk, NY, USA).  $\chi^2$  tests  
20  
21 were used to test the association between hypertension and categorical potentially  
22  
23 confounding variables. After preliminary univariate analyses, we used logistic regression  
24  
25 models to examine the effect of sleep duration on the risk of hypertension. Four regression  
26  
27 models were generated: the first model was conducted without adjustment for any covariates.  
28  
29 Covariates in the first adjusted multivariate model (model 2) included age, gender, education,  
30  
31 marital status, occupation, family per capita monthly income. Model 3 was adjusted for  
32  
33 factors in model 2 plus BMI. And model 4 was adjusted further for smoking, drinking, diet  
34  
35 habit, physical exercise. The dependent variable was the presence of hypertension. In addition,  
36  
37 we performed subgroup analysis stratified by age and sex. A probability level of *P*-values  
38  
39 less than 0.05 was considered as statistically significant.

### 40 **Patient involvement**

41  
42 No patients were involved in the design of this study, the specific aims or the research  
43  
44 questions, nor were they involved in the recruitment to and conduct of the study. No patients  
45  
46 were involved in the interpretation of study results or write up of the manuscript. There are  
47  
48 no plans to disseminate the results of the research to study participants.

### 49 **Results**

50  
51 The baseline characteristics of the study population according to sleep duration levels are  
52  
53 presented in Table 1. Of the 19407 participants in our study (53.0% female; mean age: 47.53  
54  
55  
56  
57  
58  
59  
60

years; SD: 13.13 years; range: 18 to 79 years), the median reported sleep duration of the study population was 7.00 h/d, 36.6% of the subjects reported a sleep duration of less than 7 hours per day, and an average sleep duration of 8 or more hours per day was reported by 37.8% of the study population. Significant differences were observed between sleep duration and sex, age, education, marital status, occupation, income, smoking, drinking, diet habits, exercise, and BMI.

Table 1 Characteristics of the three groups stratified according to sleep duration

| Characteristic | Group               | Sleep Duration |            |            | $\chi^2$ | P      |
|----------------|---------------------|----------------|------------|------------|----------|--------|
|                |                     | <7h/d          | 7-8h/d     | >8h/d      |          |        |
|                | Numbers of subjects | 7106(36.6)     | 4964(25.6) | 7337(37.8) |          |        |
| Sex            | Male                | 3364(36.9)     | 2406(26.4) | 3348(36.7) | 10.143   | 0.006  |
|                | Female              | 3742(36.4)     | 2558(24.9) | 3989(38.8) |          |        |
| Age            | 18-44               | 2100(26.5)     | 2148(27.1) | 3683(46.4) | 660.611  | <0.001 |
|                | 45-59               | 3295(42.9)     | 1940(25.3) | 2440(31.8) |          |        |
|                | 60-79               | 1711(45.0)     | 876(23.1)  | 1214(31.9) |          |        |
| Education      | Elementary          | 2316(40.0)     | 1362(23.5) | 2111(36.5) | 109.944  | <0.001 |
|                | Junior              | 1999(35.7)     | 1447(25.8) | 2154(38.5) |          |        |
|                | Senior              | 1887(38.1)     | 1232(24.9) | 1833(37.0) |          |        |
|                | University          | 904(29.5)      | 923(30.1)  | 1239(40.4) |          |        |
| Marital Status | Married             | 6101(36.4)     | 4321(25.7) | 6360(37.9) | 184.756  | <0.001 |
|                | Unmarried           | 343(25.9)      | 366(27.7)  | 613(46.4)  |          |        |
|                | Separated/divorced  | 180(49.9)      | 75(20.8)   | 106(29.4)  |          |        |
|                | Widowed             | 482(51.2)      | 202(21.4)  | 258(27.4)  |          |        |
| Occupation     | Manual labor        | 3241(35.4)     | 2294(25.1) | 3622(39.6) | 172.040  | <0.001 |
|                | Mental labor        | 2071(33.5)     | 1653(26.7) | 2461(39.8) |          |        |
|                | Unemployed          | 741(41.0)      | 450(24.9)  | 618(34.2)  |          |        |
|                | Retired             | 1053(46.7)     | 567(25.1)  | 636(28.2)  |          |        |
| Income(RMB)    | <1000               | 3032(38.1)     | 1927(24.2) | 2990(37.6) | 29.632   | <0.001 |
|                | 1000-3000           | 3452(36.2)     | 2503(26.3) | 3570(37.5) |          |        |
|                | >3000               | 622(32.2)      | 534(27.6)  | 777(40.2)  |          |        |
| Smoking        | Never               | 4094(34.5)     | 3061(25.8) | 4717(39.7) | 69.354   | <0.001 |
|                | Yes                 | 2375(39.8)     | 1503(25.2) | 2092(35.0) |          |        |
|                | Ever                | 637(40.7)      | 400(25.6)  | 528(33.7)  |          |        |
| Drinking       | No                  | 4786(35.9)     | 3391(25.4) | 5163(38.7) | 15.863   | <0.001 |
|                | Yes                 | 2320(38.2)     | 1573(25.9) | 2174(35.8) |          |        |
| Diet habit     | Moderate            | 2283(34.0)     | 1767(26.3) | 2670(39.7) | 31.938   | <0.001 |
|                | High-salt           | 2777(37.9)     | 1856(25.3) | 2699(36.8) |          |        |
|                | Light               | 2046(38.2)     | 1341(25.0) | 1968(36.8) |          |        |



|                   |               |            |            |            |         |        |
|-------------------|---------------|------------|------------|------------|---------|--------|
| Physical exercise | Never         | 3326(36.7) | 2249(24.8) | 3477(38.4) | 112.339 | <0.001 |
|                   | Frequently    | 2342(40.4) | 1522(26.2) | 1936(33.4) |         |        |
|                   | Occasionally  | 1438(31.6) | 1193(26.2) | 1924(42.2) |         |        |
| BMI               | Normal weight | 3915(35.8) | 2797(25.6) | 4223(38.6) | 39.105  | <0.001 |
|                   | Underweight   | 260(30.7)  | 205(24.2)  | 381(45.1)  |         |        |
|                   | Overweight    | 2462(38.5) | 1648(25.8) | 2286(35.7) |         |        |
|                   | Obese         | 469(38.2)  | 314(25.5)  | 447(36.3)  |         |        |

The characteristics of the study population are shown in table 2. In our study, the overall prevalence of hypertension was 32.6% (male 37.0%, female 28.6%) . Hypertension was found to be associated with sex, age, education, marital status, occupation, family monthly income per capita. Also, hypertension was associated with smoking, drinking, diet habit, exercise and BMI. The sleep duration was 7.0 (6.0, 8.0) h/d and 7.0 (6.5, 8.0) h/d for hypertensive and non-hypertensive individuals respectively. As shown in table 2, there was a significant difference between sleep duration and the prevalence of hypertension.

Table 2 Baseline Characteristics of the Participants

| Characteristic      | Group              | Hypertension |            | $\chi^2$ | P      | OR    | 95%CI         |
|---------------------|--------------------|--------------|------------|----------|--------|-------|---------------|
|                     |                    | No           | Yes        |          |        |       |               |
| Numbers of subjects |                    | 13087(67.4)  | 6320(32.6) |          |        |       |               |
| Sex                 | Male               | 5742(63.0)   | 3376(37.0) | 155.787  | <0.001 | 1.000 | -             |
|                     | Female             | 7345(71.4)   | 2944(28.6) |          |        | 0.682 | (0.642-0.724) |
| Age                 | 18-44              | 6608(83.3)   | 1323(16.7) | 1181.906 | <0.001 | 1.000 | -             |
|                     | 45-59              | 4722(61.5)   | 2953(38.5) |          |        | 3.124 | (2.898-3.366) |
|                     | 60-79              | 1757(46.2)   | 2044(53.8) |          |        | 5.811 | (5.327-6.338) |
| Education           | Elementary         | 3509(60.6)   | 2280(39.4) | 282.324  | <0.001 | 1.000 | -             |
|                     | Junior             | 3779(67.5)   | 1821(32.5) |          |        | 0.742 | (0.687-0.801) |
|                     | Senior             | 3408(68.8)   | 1544(31.2) |          |        | 0.697 | (0.644-0.755) |
|                     | University         | 2391(78.0)   | 675(22.0)  |          |        | 0.434 | (0.393-0.480) |
| Marital Status      | Married            | 11201(66.7)  | 5581(33.3) | 366.705  | <0.001 | 1.000 | -             |
|                     | Unmarried          | 1157(87.5)   | 165(12.5)  |          |        | 0.286 | (0.242-0.338) |
|                     | Separated/divorced | 251(69.5)    | 110(30.5)  |          |        | 0.880 | (0.701-1.103) |
|                     | Widowed            | 478(50.7)    | 464(49.3)  |          |        | 1.948 | (1.708-2.222) |
| Occupation          | Manual labor       | 6159(67.3)   | 2988(32.7) | 417.761  | <0.001 | 1.000 | -             |
|                     | Mental labor       | 4634(74.9)   | 1551(25.1) |          |        | 0.688 | (0.640-0.739) |
|                     | Unemployed         | 1107(61.2)   | 702(38.8)  |          |        | 1.303 | (1.174-1.446) |
|                     | Retired            | 1187(52.6)   | 1069(47.4) |          |        | 1.850 | (1.685-2.031) |
| Income(RMB)         | <1000              | 5026(63.2)   | 2923(36.8) | 118.706  | <0.001 | 1.000 | -             |

|                   |               |            |            |          |        |       |                |
|-------------------|---------------|------------|------------|----------|--------|-------|----------------|
|                   | 1000-3000     | 6641(69.7) | 2884(30.3) |          |        | 0.747 | (0.701-0.795)  |
|                   | >3000         | 1420(73.5) | 513(26.5)  |          |        | 0.621 | (0.556-0.694)  |
| Smoking           | Never         | 8293(69.9) | 3579(30.1) | 145.176  | <0.001 | 1.000 | -              |
|                   | Yes           | 3930(65.8) | 2040(34.2) |          |        | 1.203 | (1.126-1.285)  |
|                   | Ever          | 864(55.2)  | 701(44.8)  |          |        | 1.880 | (1.689-2.092)  |
| Drinking          | No            | 9306(69.8) | 4034(30.2) | 105.100  | <0.001 | 1.000 | -              |
|                   | Yes           | 3781(62.3) | 2286(37.7) |          |        | 1.395 | (1.309-1.487)  |
| Diet habit        | Moderate      | 4748(70.7) | 1972(29.3) | 50.369   | <0.001 | 1.000 | -              |
|                   | High-salt     | 4784(65.2) | 2548(34.8) |          |        | 1.282 | (1.194-1.3777) |
|                   | Light         | 3555(66.4) | 1800(33.6) |          |        | 1.219 | (1.128-1.317)  |
| Physical exercise | Never         | 6298(69.6) | 2754(30.4) | 283.246  | <0.001 | 1.000 | -              |
|                   | Frequently    | 3430(59.1) | 2370(40.9) |          |        | 1.580 | (1.475-1.693)  |
|                   | Occasionally  | 3359(73.7) | 1196(26.3) |          |        | 0.814 | (0.752-0.882)  |
| BMI               | Normal weight | 6727(76.2) | 2105(23.8) | 1063.588 | <0.001 | 1.000 | -              |
|                   | Underweight   | 752(88.9)  | 94(11.1)   |          |        | 0.359 | (0.288-0.446)  |
|                   | Overweight    | 4211(61.5) | 2639(38.5) |          |        | 2.172 | (2.034-2.318)  |
|                   | Obese         | 1397(48.5) | 1482(51.5) |          |        | 3.142 | (2.787-3.542)  |
| Sleep Duration    | <7h/d         | 4480(63.0) | 2626(37.0) | 103.575  | <0.001 | 1.000 | -              |
|                   | 7-8h/d        | 3415(68.8) | 1549(31.2) |          |        | 1.292 | (1.197-1.396)  |
|                   | >8h/d         | 5192(70.8) | 2145(29.2) |          |        | 0.911 | (0.842-0.985)  |

Table 3 shows the results of multiple logistic regressions performed to test the associations between hypertension and sleep duration adjusted for different potential confounders. For the total sample, participants who slept less than 7 hours per day were significantly more likely to be hypertensive (OR=1.30, 95%CI:1.20-1.40, model 1). After adjusting for socio-demographic variables (OR=1.09, 95%CI:1.00-1.18, model 2), socio-demographic variables and BMI (OR=1.09, 95%CI:1.00-1.18, model 3), the sleep duration of less than 7 hours per day continued to be associated with a higher risk of hypertension. But the observed association of sleep duration with hypertension was attenuated by socio-demographic variables and BMI. Then, after adjusting for socio-demographic variables, BMI, and lifestyle factors, the short sleep duration (less than 7 hours per day) was no longer associated with hypertension (OR=1.08, 95%CI:0.99-1.17, model 4). Among longer sleepers who slept 8 or more hours per day, after adjusting for relevant confounders, we did not find an association between longer sleep duration and hypertension (OR=0.99, 95%CI:0.91-1.07, model 2; OR=1.00, 95%CI:0.92-1.09, model 3; OR=1.01, 95%CI:0.92-1.10, model 4) (Figure 1).

The logistic regression analyses were repeated after stratifying by age (18-44, 45-59, 60-79 years). Subjects between the ages of 18 and 44 years who slept less than 7 hours per day were associated with an increased probability of hypertension after considering different covariates (OR=1.38, 95%CI:1.18-1.61, model 1; OR=1.35, 95%CI:1.15-1.59, model 2; OR=1.27, 95%CI: 1.08-1.50, model 3; OR=1.24, 95%CI:1.05-1.46, model 4). However, all the four models failed to show any significant associations between sleep duration and hypertension either among subjects between the ages of 45-59 years or among subjects between the ages of 60-79 years (Figure 2).

Repeating the analysis for male and female separately, we found that the unadjusted results were similar between male and female subjects. Subjects who reported sleeping less than 7 hours per day were significantly more likely to be hypertensive than subjects who reported getting 7 to less than 8 hours per day (male: OR=1.24, 95%CI:1.12-1.39, model 1; female: OR=1.36, 95%CI=1.22-1.51, model 1). When socio-demographic variables, BMI, and lifestyle factors were included in the models, sleep duration was not associated with the risk of hypertension for both male and female subjects (Table 3).

Table 3 Logistic regression analyses of the relationship between hypertension and categorical sleep duration

| Sleep Duration | Model 1         | Model 2         | Model 3         | Model 4         |
|----------------|-----------------|-----------------|-----------------|-----------------|
| Total          |                 |                 |                 |                 |
| <7h/day        | 1.30(1.20-1.40) | 1.09(1.01-1.18) | 1.09(1.01-1.18) | 1.08(0.99-1.17) |
| 7-8h/day       | 1.00            | 1.00            | 1.00            | 1.00            |
| ≥8h/day        | 0.91(0.84-0.99) | 0.99(0.91-1.07) | 1.00(0.92-1.09) | 1.01(0.92-1.10) |
| Ages 18-44     |                 |                 |                 |                 |
| <7h/day        | 1.38(1.18-1.61) | 1.35(1.15-1.59) | 1.27(1.08-1.50) | 1.24(1.05-1.46) |
| 7-8h/day       | 1.00            | 1.00            | 1.00            | 1.00            |
| ≥8h/day        | 0.89(0.77-1.03) | 0.95(0.82-1.11) | 0.98(0.84-1.14) | 0.99(0.84-1.15) |
| Ages 45-59     |                 |                 |                 |                 |
| <7h/day        | 1.02(0.91-1.15) | 1.01(0.90-1.14) | 1.03(0.91-1.16) | 1.02(0.91-1.15) |
| 7-8h/day       | 1.00            | 1.00            | 1.00            | 1.00            |
| ≥8h/day        | 1.03(0.91-1.17) | 1.03(0.91-1.17) | 1.03(0.91-1.17) | 1.03(0.91-1.17) |
| Ages 60-79     |                 |                 |                 |                 |
| <7h/day        | 1.02(0.87-1.20) | 1.02(0.86-1.20) | 1.03(0.87-1.21) | 1.02(0.86-1.20) |
| 7-8h/day       | 1.00            | 1.00            | 1.00            | 1.00            |
| ≥8h/day        | 1.06(0.89-1.26) | 1.07(0.89-1.27) | 1.06(0.89-1.27) | 1.06(0.89-1.27) |

| Male     |                 |                 |                 |                  |
|----------|-----------------|-----------------|-----------------|------------------|
| <7h/day  | 1.24(1.12-1.39) | 1.08(0.97-1.21) | 1.08(0.97-1.22) | 1.06(0.94-1.191) |
| 7-8h/day | 1.00            | 1.00            | 1.00            | 1.00             |
| ≥8h/day  | 1.00(0.90-1.12) | 1.02(0.91-1.14) | 1.03(0.92-1.16) | 1.04(0.92-1.17)  |
| Female   |                 |                 |                 |                  |
| <7h/day  | 1.36(1.22-1.51) | 1.08(0.96-1.22) | 1.09(0.96-1.23) | 1.09(0.96-1.23)  |
| 7-8h/day | 1.00            | 1.00            | 1.00            | 1.00             |
| ≥8h/day  | 0.84(0.75-0.95) | 1.01(0.89-1.14) | 1.01(0.89-1.14) | 1.01(0.90-1.14)  |

Model 1: Unadjusted;

Model 2: Adjusted for age, sex education, marital status, occupation, income;

Model 3: Adjusted for age, sex, education, marital status, occupation, income, BMI;

Model 4: Adjusted for age, sex, education, marital status, occupation, income, BMI, smoking, drinking, diet habit, physical exercise.

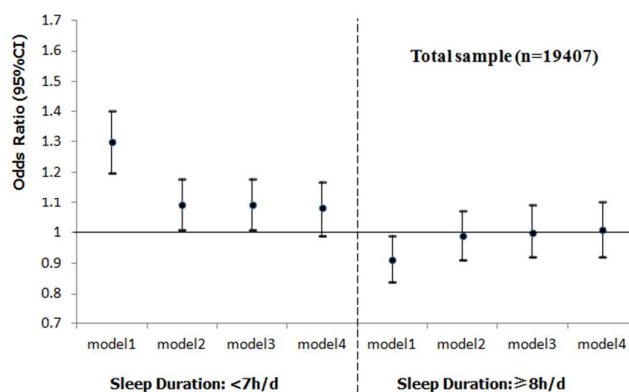

Figure 1 Odds Ratios (OR) and 95% confidence intervals (95%CI) of hypertension by sleep duration in the total population

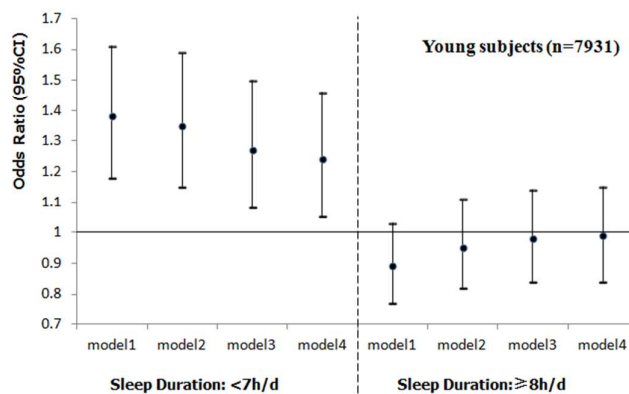

Figure 2 Odds Ratios (OR) and 95% confidence intervals (95%CI) of hypertension by sleep duration in the young subjects (aged 18-44 years)

## Discussion

This present study described an analysis of the Jilin Provincial Chronic Disease Survey,

1  
2  
3  
4  
5  
6  
7  
8  
9  
10  
11  
12  
13  
14  
15  
16  
17  
18  
investigating the relationship between sleep duration and hypertension. In this cross-sectional study, we observed an association between short sleep duration (less than 7 hours per day) and an increased risk of hypertension in the youth (18-44 years). This association was attenuated by the inclusion in the multivariate models of socio-demographic covariates, BMI and lifestyle factors. Compared with the youth, an association between short sleep duration and hypertension was not found for the middle-aged (45-59 years), old (60-79 years) participants or the total sample. Further more, no association between sleep duration and hypertension in the male participants or the female separately was found.

19  
20  
21  
22  
23  
24  
25  
26  
27  
28  
29  
30  
31  
32  
33  
34  
35  
36  
37  
38  
39  
40  
41  
42  
43  
44  
45  
46  
47  
48  
49  
There have been several studies<sup>18-22</sup> of the relationship between sleep duration and blood pressure. In 2006<sup>12</sup>, Gottlieb et al found that short sleep duration (less than 7 hours per night) was associated with a higher risk of hypertension compared with a sleep duration of 7 to less than 8 hours per night in the Sleep Heart Health Study (SHHS). In the same year, Gangwisch et al<sup>13</sup> conducted longitudinal analyses of the first National Health and Nutrition Examination Survey, and the results showed that sleep durations of less than 5 hours per night was associated increased risk of hypertension in subjects aged 32 to 59 years. In cross-sectional and prospective analyses of the Whitehall II Study<sup>23</sup>, short duration of sleep (less than 5 hours per night) was associated with increased risk of hypertension among women, compared with the median sleep duration of 7 hours. The result of the Whitehall II Study was different from ours, which may be caused by different study population. Recent reviews<sup>9 24 25</sup> and meta-analyses<sup>26 27</sup> further clarified the association between short sleep duration and hypertension risk. Two adult meta-analyses<sup>10 11</sup> showed similar results indicating that short sleep duration was associated with an increased risk of hypertension (OR=1.20, 95%CI:1.09–1.32,  $P<0.001$ ; OR=1.21, 95%CI:1.09–1.34,  $P<0.001$ ). A meta-analysis<sup>26</sup> based on 17 cohort studies demonstrated that short sleep duration increased the risk of hypertension incidence (RR=1.21, 95%CI:1.05–1.40).

50  
51  
52  
53  
54  
55  
56  
57  
58  
59  
60  
The biologic mechanisms underlying the association of short sleep duration and hypertension are complex and still partly unknown. Early data indicated a lower level of sympathetic-nerve activity and blood pressure during deep non-REM sleep<sup>28</sup>. While during

1  
2  
3  
4 rapid-eye-movement (REM) sleep, there is an increase of sympathetic-nerve activity resulting  
5 in surges in blood pressure<sup>28</sup>. Increased sympathetic activities which can be caused by short  
6 sleep duration may be associated with hypertension<sup>29-31</sup>. Recent studies found that sleep loss  
7 may affect blood pressure reactions to stress, contributing to an increased risk for some  
8 cardiovascular diseases<sup>32</sup>. In addition, disrupted circadian rhythmicity and autonomic balance  
9 caused by short sleep durations may contribute to hypertension.

10  
11  
12  
13  
14  
15  
16  
17  
18  
19  
20  
21  
22  
23  
24  
25  
26  
27  
28  
29  
30  
31  
32  
33  
34  
35  
36  
37  
38  
39  
40  
41  
42  
43  
44  
45  
46  
47  
48  
49  
50  
51  
52  
53  
54  
55  
56  
57  
58  
59  
60  
There are several strengths of this analysis. This study is based on data from a large, representative sample of the Jilin population, and this prospective study minimized the selection and recall bias. There are excellent response rates to the sleep duration questions and hypertension questions and measurements. Finally, a broad range of covariates are controlled for in the analysis, including age, sex, education, marital status, income, occupation, BMI, drinking, smoking, diet habit, and exercise. The limitation of this study lies in the properties of the cross-sectional study and the recall bias of all self-reported sleep duration.

## 31 **Conclusion**

32  
33  
34  
35  
36  
37  
38  
39  
40  
41  
42  
43  
44  
45  
46  
47  
48  
49  
50  
51  
52  
53  
54  
55  
56  
57  
58  
59  
60  
According to the results of our study, we demonstrated a significant association between short sleep duration (less than 7 hours per day) and hypertension in the youth sample, which indicates that short duration of sleep is an important risk factor for hypertension in the youth. We suggest that the youth in Jilin Province should maintain enough sleep duration. Furthermore, the CDC (Center for Disease Control and Prevention) of Jilin province should pay more attention to popularize the health damage caused by short sleep duration.

## 44 **Acknowledgments**

45  
46  
47  
48  
49  
50  
51  
52  
53  
54  
55  
56  
57  
58  
59  
60  
The contributions of all of the participants, patient advisers and interviewers are gratefully acknowledged. This study was supported by grants from the Center for Disease Prevention and Control in Jilin Province.

## 52 **Data sharing statement**

53  
54  
55  
56  
57  
58  
59  
60  
The survey was implemented by School of Public Health, Jilin University and Jilin Center for

1  
2  
3  
4 Disease Control and Prevention in Jilin Province in 2012. According to relevant regulations,  
5 the data can not be shared.  
6  
7

## 8 **Funding**

9  
10 This study was supported by a competitive grant from the Scientific Research Foundation of  
11 the Health Bureau of Jilin Province, China (grant number: 2011Z116).  
12  
13

## 14 **Author Contributions**

15  
16 Formal analysis, Meng Li; Investigation, Bo Li; Methodology, Bo Li; Writing – original draft,  
17 Meng Li; Writing – review & editing, Meng Li, Shoumeng Yan, Shan Jiang, Xiaoyu Ma and  
18 Tianyu Gao.  
19  
20  
21

## 22 **Conflicts of Interest**

23  
24 The authors declare no conflict of interest.  
25  
26

## 27 **References**

- 28  
29 1. Aronow WS. Hypertension guidelines. *Hypertension (Dallas, Tex : 1979)* 2011;58(3):347-8. doi:  
30 10.1161/hypertensionaha.111.177147 [published Online First: 2011/07/20]  
31 2. Poulter NR, Prabhakaran D, Caulfield M. Hypertension. *Lancet (London, England)* 2015;386(9995):801-12.  
32 doi: 10.1016/s0140-6736(14)61468-9 [published Online First: 2015/04/03]  
33 3. Kearney PM, Whelton M, Reynolds K, et al. Global burden of hypertension: analysis of worldwide data.  
34 *Lancet (London, England)* 2005;365(9455):217-23. doi: 10.1016/s0140-6736(05)17741-1 [published Online  
35 First: 2005/01/18]  
36 4. Lim SS, Vos T, Flaxman AD, et al. A comparative risk assessment of burden of disease and injury attributable  
37 to 67 risk factors and risk factor clusters in 21 regions, 1990-2010: a systematic analysis for the Global  
38 Burden of Disease Study 2010. *Lancet (London, England)* 2012;380(9859):2224-60. doi:  
39 10.1016/s0140-6736(12)61766-8 [published Online First: 2012/12/19]  
40 5. Lloyd-Jones D, Adams R, Carnethon M, et al. Heart disease and stroke statistics--2009 update: a report from  
41 the American Heart Association Statistics Committee and Stroke Statistics Subcommittee. *Circulation*  
42 2009;119(3):e21-181. doi: 10.1161/circulationaha.108.191261 [published Online First: 2008/12/17]  
43 6. Go AS, Mozaffarian D, Roger VL, et al. Heart disease and stroke statistics--2013 update: a report from the  
44 American Heart Association. *Circulation* 2013;127(1):e6-e245. doi: 10.1161/CIR.0b013e31828124ad  
45 [published Online First: 2012/12/15]  
46 7. St-Onge MP, Grandner MA, Brown D, et al. Sleep Duration and Quality: Impact on Lifestyle Behaviors and  
47 Cardiometabolic Health: A Scientific Statement From the American Heart Association. *Circulation*  
48 2016;134(18):e367-e86. doi: 10.1161/cir.0000000000000444 [published Online First: 2016/11/02]  
49 8. Faraut B, Touchette E, Gamble H, et al. Short sleep duration and increased risk of hypertension: a primary  
50 care medicine investigation. *Journal of hypertension* 2012;30(7):1354-63. doi:  
51  
52  
53  
54  
55  
56  
57  
58  
59  
60



- 10.1097/HJH.0b013e32835465e5 [published Online First: 2012/05/19]
9. Pepin JL, Borel AL, Tamisier R, et al. Hypertension and sleep: overview of a tight relationship. *Sleep medicine reviews* 2014;18(6):509-19. doi: 10.1016/j.smrv.2014.03.003 [published Online First: 2014/05/23]
  10. Wang Q, Xi B, Liu M, et al. Short sleep duration is associated with hypertension risk among adults: a systematic review and meta-analysis. *Hypertension research : official journal of the Japanese Society of Hypertension* 2012;35(10):1012-8. doi: 10.1038/hr.2012.91 [published Online First: 2012/07/06]
  11. Guo X, Zheng L, Wang J, et al. Epidemiological evidence for the link between sleep duration and high blood pressure: a systematic review and meta-analysis. *Sleep medicine* 2013;14(4):324-32. doi: 10.1016/j.sleep.2012.12.001 [published Online First: 2013/02/12]
  12. Gottlieb DJ, Redline S, Nieto FJ, et al. Association of usual sleep duration with hypertension: the Sleep Heart Health Study. *Sleep* 2006;29(8):1009-14. [published Online First: 2006/09/02]
  13. Gangwisch JE, Heymsfield SB, Boden-Albala B, et al. Short sleep duration as a risk factor for hypertension: analyses of the first National Health and Nutrition Examination Survey. *Hypertension (Dallas, Tex : 1979)* 2006;47(5):833-9. doi: 10.1161/01.HYP.0000217362.34748.e0 [published Online First: 2006/04/06]
  14. Matthews KA, Chang Y, Kravitz HM, et al. Sleep and risk for high blood pressure and hypertension in midlife women: the SWAN (Study of Women's Health Across the Nation) Sleep Study. *Sleep medicine* 2014;15(2):203-8. doi: 10.1016/j.sleep.2013.11.002 [published Online First: 2013/12/24]
  15. Sforza E, Saint Martin M, Barthelemy JC, et al. Association of self-reported sleep and hypertension in non-insomniac elderly subjects. *Journal of clinical sleep medicine : JCSM : official publication of the American Academy of Sleep Medicine* 2014;10(9):965-71. doi: 10.5664/jcsm.4026 [published Online First: 2014/08/22]
  16. Wang S, Kou C, Liu Y, et al. Rural-urban differences in the prevalence of chronic disease in northeast China. *Asia-Pacific journal of public health* 2015;27(4):394-406. doi: 10.1177/1010539514551200 [published Online First: 2014/09/24]
  17. Clinical Guidelines on the Identification, Evaluation, and Treatment of Overweight and Obesity in Adults--The Evidence Report. National Institutes of Health. *Obesity research* 1998;6 Suppl 2:51s-209s. [published Online First: 1998/11/14]
  18. Satoh H, Nishihira J, Wada T, et al. The relation between habitual sleep duration and blood pressure values in Japanese male subjects. *Environmental health and preventive medicine* 2013;18(3):215-20. doi: 10.1007/s12199-012-0309-3 [published Online First: 2012/10/23]
  19. Fung MM, Peters K, Ancoli-Israel S, et al. Total sleep time and other sleep characteristics measured by actigraphy do not predict incident hypertension in a cohort of community-dwelling older men. *Journal of clinical sleep medicine : JCSM : official publication of the American Academy of Sleep Medicine* 2013;9(6):585-91. doi: 10.5664/jcsm.2756 [published Online First: 2013/06/19]
  20. Kuciene R, Dulskiene V. Associations of short sleep duration with prehypertension and hypertension among Lithuanian children and adolescents: a cross-sectional study. *BMC public health* 2014;14:255. doi: 10.1186/1471-2458-14-255 [published Online First: 2014/03/19]
  21. Peach H, Gaultney JF, Reeve CL. Sleep characteristics, body mass index, and risk for hypertension in young adolescents. *Journal of youth and adolescence* 2015;44(2):271-84. doi: 10.1007/s10964-014-0149-0 [published Online First: 2014/07/09]
  22. Hoevenaar-Blom MP, Spijkerman AM, Kromhout D, et al. Sleep duration and sleep quality in relation to 12-year cardiovascular disease incidence: the MORGEN study. *Sleep* 2011;34(11):1487-92. doi:



- 10.5665/sleep.1382 [published Online First: 2011/11/02]
23. Cappuccio FP, Stranges S, Kandala NB, et al. Gender-specific associations of short sleep duration with prevalent and incident hypertension: the Whitehall II Study. *Hypertension (Dallas, Tex : 1979)* 2007;50(4):693-700. doi: 10.1161/hypertensionaha.107.095471 [published Online First: 2007/09/06]
24. Knutson KL. Sleep duration and cardiometabolic risk: a review of the epidemiologic evidence. *Best practice & research Clinical endocrinology & metabolism* 2010;24(5):731-43. doi: 10.1016/j.beem.2010.07.001 [published Online First: 2010/11/30]
25. Gangwisch JE. Epidemiological evidence for the links between sleep, circadian rhythms and metabolism. *Obesity reviews : an official journal of the International Association for the Study of Obesity* 2009;10 Suppl 2:37-45. doi: 10.1111/j.1467-789X.2009.00663.x [published Online First: 2009/10/29]
26. Meng L, Zheng Y, Hui R. The relationship of sleep duration and insomnia to risk of hypertension incidence: a meta-analysis of prospective cohort studies. *Hypertension research : official journal of the Japanese Society of Hypertension* 2013;36(11):985-95. doi: 10.1038/hr.2013.70 [published Online First: 2013/09/06]
27. Wang Y, Mei H, Jiang YR, et al. Relationship between Duration of Sleep and Hypertension in Adults: A Meta-Analysis. *Journal of clinical sleep medicine : JCSM : official publication of the American Academy of Sleep Medicine* 2015;11(9):1047-56. doi: 10.5664/jcsm.5024 [published Online First: 2015/04/24]
28. Somers VK, Dyken ME, Mark AL, et al. Sympathetic-nerve activity during sleep in normal subjects. *The New England journal of medicine* 1993;328(5):303-7. doi: 10.1056/nejm199302043280502 [published Online First: 1993/02/04]
29. Fernandez-Mendoza J, Vgontzas AN, Liao D, et al. Insomnia with objective short sleep duration and incident hypertension: the Penn State Cohort. *Hypertension (Dallas, Tex : 1979)* 2012;60(4):929-35. doi: 10.1161/hypertensionaha.112.193268 [published Online First: 2012/08/16]
30. Spiegelhalder K, Fuchs L, Ladwig J, et al. Heart rate and heart rate variability in subjectively reported insomnia. *Journal of sleep research* 2011;20(1 Pt 2):137-45. doi: 10.1111/j.1365-2869.2010.00863.x [published Online First: 2010/07/16]
31. Kario K, Schwartz JE, Pickering TG. Changes of nocturnal blood pressure dipping status in hypertensives by nighttime dosing of alpha-adrenergic blocker, doxazosin : results from the HALT study. *Hypertension (Dallas, Tex : 1979)* 2000;35(3):787-94. [published Online First: 2000/03/18]
32. Franzen PL, Gianaros PJ, Marsland AL, et al. Cardiovascular reactivity to acute psychological stress following sleep deprivation. *Psychosomatic medicine* 2011;73(8):679-82. doi: 10.1097/PSY.0b013e31822ff440 [published Online First: 2011/09/29]

# BMJ Open

## Relationship between sleep duration and hypertension in Northeast China: a cross-sectional study

|                                 |                                                                                                                                                                                                                                                                                                                                                                                                                                                                                                                                                                                 |
|---------------------------------|---------------------------------------------------------------------------------------------------------------------------------------------------------------------------------------------------------------------------------------------------------------------------------------------------------------------------------------------------------------------------------------------------------------------------------------------------------------------------------------------------------------------------------------------------------------------------------|
| Journal:                        | <i>BMJ Open</i>                                                                                                                                                                                                                                                                                                                                                                                                                                                                                                                                                                 |
| Manuscript ID                   | bmjopen-2018-023916.R1                                                                                                                                                                                                                                                                                                                                                                                                                                                                                                                                                          |
| Article Type:                   | Research                                                                                                                                                                                                                                                                                                                                                                                                                                                                                                                                                                        |
| Date Submitted by the Author:   | 31-Aug-2018                                                                                                                                                                                                                                                                                                                                                                                                                                                                                                                                                                     |
| Complete List of Authors:       | Li, Meng; Jilin University School of Public Health, Department of Epidemiology and Biostatistics<br>Yan, shoumeng; Jilin University School of Public Health, Department of Epidemiology and Biostatistics<br>Jiang, Shan; Jilin University School of Public Health, Department of Epidemiology and Biostatistics<br>Ma, Xiaoyu; Jilin University School of Public Health, Department of Epidemiology and Biostatistics<br>Gao, Tianyu; Jilin University School of Public Health, Department of Epidemiology and Biostatistics; Changchun Health Supervision Institute<br>Li, Bo |
| <b>Primary Subject Heading</b>: | Epidemiology                                                                                                                                                                                                                                                                                                                                                                                                                                                                                                                                                                    |
| Secondary Subject Heading:      | Public health                                                                                                                                                                                                                                                                                                                                                                                                                                                                                                                                                                   |
| Keywords:                       | Hypertension < CARDIOLOGY, EPIDEMIOLOGY, sleep                                                                                                                                                                                                                                                                                                                                                                                                                                                                                                                                  |
|                                 |                                                                                                                                                                                                                                                                                                                                                                                                                                                                                                                                                                                 |

SCHOLARONE™  
Manuscripts

# Relationship between sleep duration and hypertension in Northeast China: a cross-sectional study

Meng Li<sup>1</sup>, Shoumeng Yan<sup>1</sup>, Shan Jiang<sup>1</sup>, Xiaoyu Ma<sup>1</sup>, Tianyu Gao<sup>1,2</sup> and Bo Li<sup>1,\*</sup>

<sup>1</sup> Department of Epidemiology and Biostatistics, School of Public Health, Jilin University, Changchun 130021, China; E-Mails: lm17@mails.jlu.edu.cn (M.L.); yansm17@mails.jlu.edu.cn(S.Y.); jiangs17@mails.jlu.edu.cn(S.J.); maxy17@mails.jlu.edu.cn(X.M.);

<sup>2</sup> Changchun Health Supervision Institute, Changchun, 130000, China; E-Mail: gaoty17@mails.jlu.edu.cn (T.G.);

\* Correspondence to: Bo Li; Postal address: No.1163 Xinmin Street, Changchun City, Jilin Province, China. E-mail: li\_bo@jlu.edu.cn; Tel.: +86-431-85619451.

**Keywords:** sleep; hypertension; epidemiology;

**Word count:** 2704 words (excluding title page, references, figures and tables)

## Abstract

**Objectives:** Previous studies have reported that sleep duration might increase the risk of hypertension. However, the results have been conflicting. We investigated whether sleep duration is independently associated with hypertension. We aimed to assess the relationship between sleep duration and hypertension in a population-based cross-sectional study.

**Methods:** In this study, we used multistage stratified cluster sampling. A total of 19 407 adults aged 18-79 years were enrolled in the study. The participants were divided into three groups (<7 h/d, 7-8 h/d, >8 h/d) according to self-reported sleep duration. Hypertension was defined as systolic blood pressure (SBP)  $\geq 140$  mmHg or diastolic blood pressure (DBP)  $\geq 90$  mmHg or the use of anti-hypertensive medications. Univariate and multivariate logistic regressions were performed to determine the association between hypertension and sleep duration adjusted for socio-demographic, BMI, and lifestyle covariates.

**Results:** The overall prevalence of hypertension was 32.6%. Among participants aged 18-44 years, individuals sleeping less than 7 hours per day had a higher risk of hypertension (OR=1.24, 95%CI:1.05-1.46), compared with those who slept 7-8 hours per day. There were no significant associations between sleep duration and hypertension among the total sample, middle-aged adults (45-59 years), or older adults (60-79 years).

**Conclusions:** Our study demonstrates that short sleep duration was significantly associated with hypertension among people aged 18-44 years in Northeast China.

## Article Summary

### Strengths and limitations of this study

- A multistage, stratified random cluster sampling design was used to obtain a large, representative sample of the Jilin population.
- There were excellent response rates to the sleep duration questions and the hypertension questions and measurements.
- A broad range of covariates were controlled for in the analysis, including age, sex, education, marital status, income, occupation, BMI, drinking, smoking, salt intake, and

exercise.

- The limitation of this study is that the sleep duration obtained from the questionnaire was subjective and may differ from precisely measured sleep duration.

## Introduction

In many countries, the diagnosis of hypertension is based on a systolic blood pressure (SBP) of at least 140 mmHg, a diastolic blood pressure (DBP) of at least 90 mmHg, or both.<sup>1 2</sup> In 2000, the overall prevalence of hypertension was 26.4% worldwide.<sup>3</sup> In 2010, hypertension was the leading single contributor to global mortality, being responsible for more than 9 million deaths.<sup>4</sup> Data from National Health and Nutrition Examination Survey (NHANES) in 2011-2012 estimated the overall prevalence of hypertension among U.S. adults aged 18 and over was 29.1% (29.7% men and 28.5% women).<sup>5</sup> The latest data from the Global Burden of Disease Study in 2015 showed that high systolic blood pressure continues to be the largest contributor to global disability-adjusted life-years (DALYs), causing 211.8 million global DALYs each year.<sup>6</sup> According to a previous study,<sup>7</sup> hypertension is a major risk factor for cardiovascular disease (CVD), heart attack, heart failure, stroke and kidney disease. Studies have shown that sleep duration is associated with hypertension.<sup>8 9</sup> Short sleep duration, usually defined as less than 7 h, 6 h or 5 hours per night,<sup>10</sup> was associated with an increased risk of prevalent hypertension.<sup>11 12</sup> The relationship between self-reported sleep duration and hypertension was first reported as a U-shaped association in the Sleep Heart Health Study (SHHS).<sup>13</sup> In the study, Gottlieb et al. found that sleep duration less than 7 hours per night or more than 8 hours per night was associated with an increased prevalence of hypertension. The results from the Nation Health and Nutrition Examination Survey (NHANES) also demonstrated an association between sleep durations of less than 5 hours per night and an increased risk of hypertension in the same year.<sup>14</sup> However, there are conflicting results. A community-based 7-site study<sup>15</sup> came to the conclusion that sleep duration was unrelated to blood pressure cross-sectionally or longitudinally in midlife women. Similarly, a study among non-insomniac elderly subjects<sup>16</sup> indicated that sleep duration was not associated with the prevalence of hypertension. Therefore, the relationship between sleep duration and

1  
2  
3  
4  
5 hypertension needs to be further investigated.

6  
7 In this study, we investigated the relationship between self-reported sleep duration and  
8 hypertension among subjects who participated in a representative population-based survey  
9 from the Jilin province in Northeast China. Moreover, the role of age and sex in the  
10 relationship between sleep duration and hypertension was also evaluated.  
11  
12  
13

## 14 15 **Methods**

### 16 17 **Study design and population**

18  
19 This study was embedded in the Jilin Provincial Chronic Disease Survey, a population-based  
20 cross-sectional study conducted from June 2012 to August 2012. A multistage stratified  
21 cluster sampling method was used to select a representative sample of community-dwelling  
22 residents who had lived in nine regions of Jilin Province (Changchun, Jilin, Siping, Liaoyuan,  
23 Tonghua, Baishan, Songyuan, Baicheng and Yanbian) for at least six months. The detailed  
24 stratifying process was reported previously.<sup>17</sup> A total of 23 050 individuals were recruited,  
25 and 21 435 of them completed the survey (84.9% response rate). In this study, 2028 subjects  
26 were excluded from the statistical analyses due to missing data on marital status, occupation,  
27 income, height, weight, systolic blood pressure or diastolic blood pressure, yielding a final  
28 sample size of 19 407 subjects. Among the 2028 excluded subjects (1218 males, 809 females),  
29 the mean age was 47.07 years (SD 13.40, range 18-79 years).  
30  
31  
32  
33  
34  
35  
36  
37  
38

39  
40 Ethical approval was obtained by the Ethics Committee of Jilin University School of  
41 Public Health. We adhered to the bioethics principles of the Declaration of Helsinki, and  
42 written informed consent was obtained from all participants.  
43  
44

### 45 46 **Definition of major variables**

47  
48 After at least 5 minutes of rest, two blood-pressure measurements were made with the  
49 participants in a seated position, using appropriately sized cuffs and calibrated electronic  
50 sphygmomanometers (OMRON-HEM-7200, Omron Corporation, Kyoto, Japan). The mean  
51 of the two blood pressure measurements taken at 2-minute intervals was used in the analyses.  
52  
53  
54 In our study, hypertension was defined as SBP  $\geq$ 140 mmHg or DBP  $\geq$ 90 mmHg or the current  
55  
56  
57  
58  
59  
60

1  
2  
3  
4  
5 use of anti-hypertensive medication.

6 Self-reported sleep duration was assessed by the following question: “On average, how  
7 many hours of actual sleep did you get each day (24 h) during the past month?” The results  
8 were categorized into 3 groups for analysis: <7 , 7-8, and  $\geq 8$  h/d, and we chose the category  
9 of 7-8 h/d as the reference group, in accordance with a previous study.<sup>13</sup>

10 A structured questionnaire was used to collect socio-demographic information of the  
11 participants, and the measured characteristics included gender (male, female), age (18-44,  
12 45-59, 60-79 years), education (elementary, junior, senior, university), marital status (married,  
13 unmarried, separated/divorced, widowed), occupation (manual labour, mental labour,  
14 unemployed, retired), and family monthly income per capita (<1000, 1000-3000, >3000  
15 RMB). The body mass index (BMI) was measured, calculated as weight (kg)/height squared  
16 ( $\text{kg}/\text{m}^2$ ). All participants were categorized as underweight ( $\text{BMI}<18.5 \text{ kg}/\text{m}^2$ ), normal weight  
17 ( $\text{BMI}=18.5$  to  $25 \text{ kg}/\text{m}^2$ ), overweight ( $\text{BMI}=25.0$  to  $30.0 \text{ kg}/\text{m}^2$ ) or obese ( $\text{BMI}>30.0$   
18  $\text{kg}/\text{m}^2$ ).<sup>18</sup> Other variables, including smoking status (yes, no, former), drinking (yes, no), salt  
19 intake (high-salt, light, moderate), and physical exercise (frequently, occasionally, never)  
20 were assessed. A smoker was defined as a person who had smoked at least one cigarette a day  
21 over the past 30 days; a former smoker was defined as a person who had smoked more than  
22 100 cigarettes cumulatively, but had quit smoking or had not reached the current smoking  
23 level at the time of the survey; participants who reported never having smoked 100 cigarettes  
24 were defined as never-smokers. A drinker was defined as a person who consumed an average  
25 of more than one alcoholic drink per week. Based on self-report results, we divided the salt  
26 intake into three categories: high salt, light and moderate. Participants who exercised more  
27 than three times a week were defined as “exercise frequently”; those who exercised one or  
28 two times a week were defined as “exercise occasionally”; and those who usually exercised  
29 less than one time a week were defined as “never exercise”.

### 30 31 32 33 34 35 36 37 38 39 40 41 42 43 44 45 46 47 48 49 50 51 **Statistical analysis**

52 Data were analysed using SPSS software (ver. 24.0; IBM Corp.; Armonk, NY, USA).  $\chi^2$  tests  
53 were used to test the association between hypertension and categorical potentially  
54  
55  
56  
57  
58  
59  
60

1  
2  
3  
4  
5 confounding variables. A *P*-value of less than 0.05 was considered statistically significant.  
6  
7 After preliminary univariate analyses, we used logistic regression models to examine the  
8 effect of sleep duration on the risk of hypertension, and the odds-ratio (OR) and 95%  
9 confidence intervals (CI) were calculated. Four regression models were generated. The first  
10 model (model 1) was generated without adjusting for any covariates. Covariates in the first  
11 adjusted multivariate model (model 2) included age, gender, education, marital status,  
12 occupation, and family per capita monthly income. Model 3 adjusted for factors in model 2  
13 plus BMI. Finally, model 4 was further adjusted for smoking, drinking, salt intake, and  
14 physical exercise. The dependent variable was the presence of hypertension. In addition, we  
15 performed subgroup analysis stratified by age and sex.  
16  
17  
18  
19  
20  
21

### 22 **Patient and Public Involvement**

23  
24 No patients were involved in the design of this study, the specific aims or the research  
25 questions, nor were they involved in the recruitment to and conduct of the study. No patients  
26 were involved in the interpretation of study results or write up of the manuscript. There are  
27 no plans to disseminate the results of the research to study participants.  
28  
29  
30  
31

### 32 **Results**

33  
34 The baseline characteristics of the study population according to sleep duration levels are  
35 presented in Table 1. Of the 19 407 participants in our study (53.0% female; mean age: 47.53  
36 years; SD: 13.13 years; range: 18 to 79 years), the median reported sleep duration of the  
37 study population was 7.00 hours per day, 36.6% of the subjects reported a sleep duration of  
38 less than 7 hours per day, and an average sleep duration of 8 or more hours per day was  
39 reported by 37.8% of the study population. Significant differences were observed between  
40 sleep duration and sex, age, education, marital status, occupation, income, smoking, drinking,  
41 salt intake, exercise, and BMI. Subjects with short sleep durations were slightly older, heavier,  
42 and had a lower level of education than subjects sleeping 7 to 8 hours per day (Table 1). They  
43 were also more likely to be male, smokers, drinkers and have a high-salt diet. Individuals  
44 with more hours of sleep per night were younger and more likely to be non-smokers and  
45  
46  
47  
48  
49  
50  
51  
52  
53  
54  
55  
56  
57  
58  
59  
60



1  
2  
3  
4  
5 non-drinkers.  
6  
7

8 Table 1 Characteristics of the three groups stratified according to sleep duration

| Characteristic    | Group               | Sleep Duration |            |            | $\chi^2$ | P      |
|-------------------|---------------------|----------------|------------|------------|----------|--------|
|                   |                     | <7 h/d         | 7-8 h/d    | >8 h/d     |          |        |
|                   | Numbers of subjects | 7106(36.6)     | 4964(25.6) | 7337(37.8) |          |        |
| Sex               | Male                | 3364(36.9)     | 2406(26.4) | 3348(36.7) | 10.143   | 0.006  |
|                   | Female              | 3742(36.4)     | 2558(24.9) | 3989(38.7) |          |        |
| Age               | 18-44               | 2100(26.5)     | 2148(27.1) | 3683(46.4) | 660.611  | <0.001 |
|                   | 45-59               | 3295(42.9)     | 1940(25.3) | 2440(31.8) |          |        |
|                   | 60-79               | 1711(45.0)     | 876(23.1)  | 1214(31.9) |          |        |
| Education         | Elementary          | 2316(40.0)     | 1362(23.5) | 2111(36.5) | 109.944  | <0.001 |
|                   | Junior              | 1999(35.7)     | 1447(25.8) | 2154(38.5) |          |        |
|                   | Senior              | 1887(38.1)     | 1232(24.9) | 1833(37.0) |          |        |
|                   | University          | 904(29.5)      | 923(30.1)  | 1239(40.4) |          |        |
| Marital Status    | Married             | 6101(36.4)     | 4321(25.7) | 6360(37.9) | 184.756  | <0.001 |
|                   | Unmarried           | 343(25.9)      | 366(27.7)  | 613(46.4)  |          |        |
|                   | Separated/divorced  | 180(49.8)      | 75(20.8)   | 106(29.4)  |          |        |
|                   | Widowed             | 482(51.2)      | 202(21.4)  | 258(27.4)  |          |        |
| Occupation        | Manual labor        | 3241(35.4)     | 2294(25.1) | 3622(39.5) | 172.040  | <0.001 |
|                   | Mental labor        | 2071(33.5)     | 1653(26.7) | 2461(39.8) |          |        |
|                   | Unemployed          | 741(40.9)      | 450(24.9)  | 618(34.2)  |          |        |
|                   | Retired             | 1053(46.7)     | 567(25.1)  | 636(28.2)  |          |        |
| Income(RMB)       | <1000               | 3032(38.2)     | 1927(24.2) | 2990(37.6) | 29.632   | <0.001 |
|                   | 1000-3000           | 3452(36.2)     | 2503(26.3) | 3570(37.5) |          |        |
|                   | >3000               | 622(32.2)      | 534(27.6)  | 777(40.2)  |          |        |
| Smoking           | Never               | 4094(34.5)     | 3061(25.8) | 4717(39.7) | 69.354   | <0.001 |
|                   | Yes                 | 2375(39.8)     | 1503(25.2) | 2092(35.0) |          |        |
|                   | Ever                | 637(40.7)      | 400(25.6)  | 528(33.7)  |          |        |
| Drinking          | No                  | 4786(35.9)     | 3391(25.4) | 5163(38.7) | 15.863   | <0.001 |
|                   | Yes                 | 2320(38.3)     | 1573(25.9) | 2174(35.8) |          |        |
| Salt intake       | Moderate            | 2283(34.0)     | 1767(26.3) | 2670(39.7) | 31.938   | <0.001 |
|                   | High-salt           | 2777(37.9)     | 1856(25.3) | 2699(36.8) |          |        |
|                   | Light               | 2046(38.2)     | 1341(25.0) | 1968(36.8) |          |        |
| Physical exercise | Never               | 3326(36.7)     | 2249(24.9) | 3477(38.4) | 112.339  | <0.001 |
|                   | Frequently          | 2342(40.4)     | 1522(26.2) | 1936(33.4) |          |        |
|                   | Occasionally        | 1438(31.6)     | 1193(26.2) | 1924(42.2) |          |        |
| BMI               | Normal weight       | 3915(35.8)     | 2797(25.6) | 4223(38.6) | 39.105   | <0.001 |
|                   | Underweight         | 260(30.7)      | 205(24.2)  | 381(45.1)  |          |        |
|                   | Overweight          | 2462(38.5)     | 1648(25.8) | 2286(35.7) |          |        |
|                   | Obese               | 469(38.2)      | 314(25.5)  | 447(36.3)  |          |        |

The characteristics of the study population stratified by hypertension are shown in table 2. In our study, the overall prevalence of hypertension was 32.6% (37.0% male, 28.6% female). Hypertension was found to be associated with sex, age, education, marital status, occupation, and family monthly income per capita. Additionally, hypertension was associated with smoking, drinking, salt intake, exercise and BMI. As shown in table 2, there was a significant difference between sleep duration and the prevalence of hypertension. Hypertensive subjects were more likely to sleep for shorter durations.

Table 2 Baseline characteristics of the participants stratified by hypertension

| Characteristic | Group               | Hypertension |            | $\chi^2$ | P      | OR    | 95%CI |       |               |
|----------------|---------------------|--------------|------------|----------|--------|-------|-------|-------|---------------|
|                |                     | No           | Yes        |          |        |       |       |       |               |
|                | Numbers of subjects | 13087(67.4)  | 6320(32.6) |          |        |       |       |       |               |
| Sex            | Male                | 5742(63.0)   | 3376(37.0) | 155.787  | <0.001 | 1.000 | -     |       |               |
|                | Female              | 7345(71.4)   | 2944(28.6) |          |        |       |       | 0.682 | (0.642-0.724) |
| Age            | 18-44               | 6608(83.3)   | 1323(16.7) | 1181.906 | <0.001 | 1.000 | -     |       |               |
|                | 45-59               | 4722(61.5)   | 2953(38.5) |          |        |       |       | 3.124 | (2.898-3.366) |
|                | 60-79               | 1757(46.2)   | 2044(53.8) |          |        |       |       | 5.811 | (5.327-6.338) |
| Education      | Elementary          | 3509(60.6)   | 2280(39.4) | 282.324  | <0.001 | 1.000 | -     |       |               |
|                | Junior              | 3779(67.5)   | 1821(32.5) |          |        |       |       | 0.742 | (0.687-0.801) |
|                | Senior              | 3408(68.8)   | 1544(31.2) |          |        |       |       | 0.697 | (0.644-0.755) |
|                | University          | 2391(78.0)   | 675(22.0)  |          |        |       |       | 0.434 | (0.393-0.480) |
| Marital Status | Married             | 11201(66.7)  | 5581(33.3) | 366.705  | <0.001 | 1.000 | -     |       |               |
|                | Unmarried           | 1157(87.5)   | 165(12.5)  |          |        |       |       | 0.286 | (0.242-0.338) |
|                | Separated/divorced  | 251(69.5)    | 110(30.5)  |          |        |       |       | 0.880 | (0.701-1.103) |
|                | Widowed             | 478(50.7)    | 464(49.3)  |          |        |       |       | 1.948 | (1.708-2.222) |
| Occupation     | Manual labor        | 6159(67.3)   | 2988(32.7) | 417.761  | <0.001 | 1.000 | -     |       |               |
|                | Mental labor        | 4634(74.9)   | 1551(25.1) |          |        |       |       | 0.688 | (0.640-0.739) |
|                | Unemployed          | 1107(61.2)   | 702(38.8)  |          |        |       |       | 1.303 | (1.174-1.446) |
|                | Retired             | 1187(52.6)   | 1069(47.4) |          |        |       |       | 1.850 | (1.685-2.031) |
| Income(RMB)    | <1000               | 5026(63.2)   | 2923(36.8) | 118.706  | <0.001 | 1.000 | -     |       |               |
|                | 1000-3000           | 6641(69.7)   | 2884(30.3) |          |        |       |       | 0.747 | (0.701-0.795) |
|                | >3000               | 1420(73.5)   | 513(26.5)  |          |        |       |       | 0.621 | (0.556-0.694) |
| Smoking        | Never               | 8293(69.9)   | 3579(30.1) | 145.176  | <0.001 | 1.000 | -     |       |               |
|                | Yes                 | 3930(65.8)   | 2040(34.2) |          |        |       |       | 1.203 | (1.126-1.285) |
|                | Ever                | 864(55.2)    | 701(44.8)  |          |        |       |       | 1.880 | (1.689-2.092) |
| Drinking       | No                  | 9306(69.8)   | 4034(30.2) | 105.100  | <0.001 | 1.000 | -     |       |               |
|                | Yes                 | 3781(62.3)   | 2286(37.7) |          |        |       |       | 1.395 | (1.309-1.487) |

|                   |               |            |            |          |        |       |                |
|-------------------|---------------|------------|------------|----------|--------|-------|----------------|
| Salt intake       | Moderate      | 4748(70.7) | 1972(29.3) | 50.369   | <0.001 | 1.000 | -              |
|                   | High-salt     | 4784(65.2) | 2548(34.8) |          |        | 1.282 | (1.194-1.3777) |
|                   | Light         | 3555(66.4) | 1800(33.6) |          |        | 1.219 | (1.128-1.317)  |
| Physical exercise | Never         | 6298(69.6) | 2754(30.4) | 283.246  | <0.001 | 1.000 | -              |
|                   | Frequently    | 3430(59.1) | 2370(40.9) |          |        | 1.580 | (1.475-1.693)  |
|                   | Occasionally  | 3359(73.7) | 1196(26.3) |          |        | 0.814 | (0.752-0.882)  |
| BMI               | Normal weight | 6727(76.2) | 2105(23.8) | 1063.588 | <0.001 | 1.000 | -              |
|                   | Underweight   | 752(88.9)  | 94(11.1)   |          |        | 0.359 | (0.288-0.446)  |
|                   | Overweight    | 4211(61.5) | 2639(38.5) |          |        | 2.172 | (2.034-2.318)  |
|                   | Obese         | 1397(48.5) | 1482(51.5) |          |        | 3.142 | (2.787-3.542)  |
| Sleep Duration    | <7 h/d        | 4480(63.0) | 2626(37.0) | 103.575  | <0.001 | 1.000 | -              |
|                   | 7-8 h/d       | 3415(68.8) | 1549(31.2) |          |        | 1.292 | (1.197-1.396)  |
|                   | >8 h/d        | 5192(70.8) | 2145(29.2) |          |        | 0.911 | (0.842-0.985)  |

Table 3 shows the results of multiple logistic regressions performed to test the associations between hypertension and sleep duration adjusted for different potential confounders. For the total sample, participants who slept less than 7 hours per day were significantly more likely to be hypertensive (OR=1.30, 95%CI:1.20-1.40, model 1). After adjusting for socio-demographic variables (OR=1.09, 95%CI:1.00-1.18, model 2), socio-demographic variables and BMI (OR=1.09, 95%CI:1.00-1.18, model 3), a sleep duration of less than 7 hours per day continued to be associated with a higher risk of hypertension. However, the observed association between sleep duration and hypertension was attenuated after adjusting for socio-demographic variables and BMI. Then, after adjusting for socio-demographic variables, BMI, and lifestyle factors, a short sleep duration (less than 7 hours per day) was no longer associated with hypertension (OR=1.08, 95%CI:0.99-1.17, model 4). Among longer sleepers who slept 8 or more hours per day, after adjusting for relevant confounders, we did not find an association between a longer sleep duration and hypertension (OR=0.99, 95%CI:0.91-1.07, model 2; OR=1.00, 95%CI:0.92-1.09, model 3; OR=1.01, 95%CI:0.92-1.10, model 4).

The logistic regression analyses were repeated after stratifying by age (18-44, 45-59, 60-79 years). Subjects between the ages of 18 and 44 years who slept less than 7 hours per day were associated with a higher probability of hypertension after considering different covariates (OR=1.38, 95%CI:1.18-1.61, model 1; OR=1.35, 95%CI:1.15-1.59, model 2; OR=1.27,

95%CI:1.08-1.50, model 3; OR=1.24, 95%CI:1.05-1.46, model 4). However, all four models failed to show any significant associations between sleep duration and hypertension either among subjects between the ages of 45-59 years or among subjects between the ages of 60-79 years.

Repeating the analysis for males and females separately, we found that the unadjusted results were similar between male and female subjects. Subjects who reported sleeping less than 7 hours per day were significantly more likely to be hypertensive than subjects who reported getting 7 to less than 8 hours of sleep per day (males: OR=1.24, 95%CI:1.12-1.39, model 1; females: OR=1.36, 95%CI=1.22-1.51, model 1). When socio-demographic variables, BMI, and lifestyle factors were included in the models, sleep duration was not associated with the risk of hypertension in either male or female subjects.

Table 3 Logistic regression analyses of the relationship between hypertension and categorical sleep duration

| Sleep Duration    | Model 1         | Model 2         | Model 3         | Model 4         |
|-------------------|-----------------|-----------------|-----------------|-----------------|
| <b>Total</b>      |                 |                 |                 |                 |
| <7 h/d            | 1.30(1.20-1.40) | 1.09(1.01-1.18) | 1.09(1.01-1.18) | 1.08(0.99-1.17) |
| 7-8 h/d           | 1.00            | 1.00            | 1.00            | 1.00            |
| ≥8 h/d            | 0.91(0.84-0.99) | 0.99(0.91-1.07) | 1.00(0.92-1.09) | 1.01(0.92-1.10) |
| <b>Ages 18-44</b> |                 |                 |                 |                 |
| <7 h/d            | 1.38(1.18-1.61) | 1.35(1.15-1.59) | 1.27(1.08-1.50) | 1.24(1.05-1.46) |
| 7-8 h/d           | 1.00            | 1.00            | 1.00            | 1.00            |
| ≥8 h/d            | 0.89(0.77-1.03) | 0.95(0.82-1.11) | 0.98(0.84-1.14) | 0.99(0.84-1.15) |
| <b>Ages 45-59</b> |                 |                 |                 |                 |
| <7 h/d            | 1.02(0.91-1.15) | 1.01(0.90-1.14) | 1.03(0.91-1.16) | 1.02(0.91-1.15) |
| 7-8 h/d           | 1.00            | 1.00            | 1.00            | 1.00            |
| ≥8 h/d            | 1.03(0.91-1.17) | 1.03(0.91-1.17) | 1.03(0.91-1.17) | 1.03(0.91-1.17) |
| <b>Ages 60-79</b> |                 |                 |                 |                 |
| <7 h/d            | 1.02(0.87-1.20) | 1.02(0.86-1.20) | 1.03(0.87-1.21) | 1.02(0.86-1.20) |
| 7-8 h/d           | 1.00            | 1.00            | 1.00            | 1.00            |
| ≥8 h/d            | 1.06(0.89-1.26) | 1.07(0.89-1.27) | 1.06(0.89-1.27) | 1.06(0.89-1.27) |
| <b>Male</b>       |                 |                 |                 |                 |
| <7 h/d            | 1.24(1.12-1.39) | 1.08(0.97-1.21) | 1.08(0.97-1.22) | 1.06(0.94-1.19) |
| 7-8 h/d           | 1.00            | 1.00            | 1.00            | 1.00            |
| ≥8 h/d            | 1.00(0.90-1.12) | 1.02(0.91-1.14) | 1.03(0.92-1.16) | 1.04(0.92-1.17) |
| <b>Female</b>     |                 |                 |                 |                 |
| <7 h/d            | 1.36(1.22-1.51) | 1.08(0.96-1.22) | 1.09(0.96-1.23) | 1.09(0.96-1.23) |

|         |                 |                 |                 |                 |
|---------|-----------------|-----------------|-----------------|-----------------|
| 7-8 h/d | 1.00            | 1.00            | 1.00            | 1.00            |
| ≥8 h/d  | 0.84(0.75-0.95) | 1.01(0.89-1.14) | 1.01(0.89-1.14) | 1.01(0.90-1.14) |

Model 1: Unadjusted;

Model 2: Adjusted for age, sex, education, marital status, occupation, income;

Model 3: Adjusted for age, sex, education, marital status, occupation, income, BMI;

Model 4: Adjusted for age, sex, education, marital status, occupation, income, BMI, smoking, drinking, salt intake, physical exercise.

## Discussion

This present study described an analysis of data collected from the Jilin Provincial Chronic Disease Survey, that investigates the relationship between sleep duration and hypertension. In this cross-sectional study, we observed an association between short sleep durations (less than 7 hours per day) and an increased risk of hypertension in young adults (18-44 years). This association was attenuated by the inclusion in the multivariate models of socio-demographic covariates, BMI and lifestyle factors. Compared with the young adults, an association between short sleep duration and hypertension was not found for the middle-aged participants (45-59 years), old participants (60-79 years) or the total sample. Furthermore, no association between sleep duration and hypertension was found when male or female participants were analysed separately.

There have been several studies<sup>19-23</sup> focusing on the relationship between sleep duration and blood pressure. However, this relationship is still controversial. Recent reviews<sup>10 24 25</sup> and meta-analyses<sup>26 27</sup> further clarified the association between short sleep durations and hypertension risk. Two adult meta-analyses<sup>11 12</sup> showed similar results, indicating that short sleep durations were associated with an increased risk of hypertension (OR=1.20, 95%CI:1.09–1.32,  $P<0.001$ ; OR=1.21, 95%CI:1.09–1.34,  $P<0.001$ ). A meta-analysis<sup>26</sup> based on 17 cohort studies demonstrated that short sleep durations increased the risk of hypertension incidence (RR=1.21, 95%CI:1.05–1.40). In fact, the relationship between hypertension and sleep duration may vary by age. In 2008, a Korean study found that short sleep durations were associated with hypertension prevalence only in those younger than 60 years.<sup>28</sup> This was consistent with a Spanish study, which demonstrated that self-reported sleep duration was not associated with hypertension in older adults.<sup>29</sup> In our study, short sleep

1  
2  
3  
4 duration was associated with a higher risk of hypertension in younger adults but not in  
5 middle-aged or elderly individuals. Changes in sleep quality and quantity in later life may be  
6 related to this age-dependent association.<sup>30</sup> Furthermore, participants experiencing  
7 hypertension are probably less likely to survive into their later years. In cross-sectional and  
8 prospective analyses of the Whitehall II Study,<sup>31</sup> short duration of sleep (less than 5 hours per  
9 night) was associated with increased risk of hypertension among women when compared  
10 with the median sleep duration of 7 hours. The result of the Whitehall II Study showed a  
11 gender-specific association between short sleep duration and prevalent and incident  
12 hypertension. However, in our findings, no association between sleep duration and  
13 hypertension was observed in men or women after taking into account potential confounders.  
14 Two factors may explain the differential association of short sleep duration and hypertension  
15 in the male and female groups. First, hormonal influences may play an important role,  
16 especially during the premenopausal period.<sup>32</sup> Second, the Sleep Heart Health Study  
17 indicated that male and female participants answer questions on sleepiness differently.<sup>33</sup>  
18 Therefore, the differential self-reporting of sleep habits of male and female participants may  
19 have an impact on these gender-specific associations.  
20  
21  
22  
23  
24  
25  
26  
27  
28  
29  
30  
31  
32  
33

34 The biological mechanisms underlying the association of short sleep duration and  
35 hypertension are complex and not fully understood. Early data indicated a lower level of  
36 sympathetic-nerve activity and blood pressure during deep non-REM sleep.<sup>34</sup> During  
37 rapid-eye-movement (REM) sleep, there is an increase of sympathetic-nerve activity resulting  
38 in surges in blood pressure.<sup>34</sup> Some other studies have also demonstrated that increased  
39 sympathetic activity due to short sleep durations may be associated with hypertension.<sup>35-37</sup> An  
40 increased 24-hour haemodynamic load due to a prolonged exposure to short sleep durations  
41 may lead to structural adaptation, such as arterial or left ventricular hypertrophy remodelling,  
42 which gradually leads to the functioning of the entire cardiovascular system under  
43 high-pressure balance.<sup>38</sup> One recent study found that sleep loss might affect blood pressure  
44 reactions to stress, contributing to an increased risk for some cardiovascular diseases.<sup>39</sup> In  
45 addition, disrupted circadian rhythmicity and autonomic balance caused by short sleep  
46  
47  
48  
49  
50  
51  
52  
53  
54  
55  
56  
57  
58  
59  
60

1  
2  
3  
4  
5 durations may contribute to hypertension.

6 This analysis has several strengths. This study is based on data from a large representative  
7 sample of the Jilin population, and this prospective study minimized selection and recall  
8 biases. There were excellent response rates to the sleep duration questions, hypertension  
9 questions, and measurements. Finally, a broad range of covariates were controlled for in the  
10 analysis, including age, sex, education, marital status, income, occupation, BMI, drinking,  
11 smoking, salt intake, and exercise. A limitation of this study lies in the properties of the  
12 cross-sectional study and the recall bias of self-reported sleep duration.  
13  
14  
15  
16  
17  
18

## 19 **Conclusion**

20  
21 The results of our study revealed a significant association between short sleep duration (less  
22 than 7 hours per day) and hypertension in the sample of young adults indicating that short  
23 sleep duration is an important risk factor for hypertension in young adults. We suggest that  
24 younger adults in the Jilin Province should maintain a sufficient sleep duration. Furthermore,  
25 the Center for Disease Control and Prevention (CDC) of the Jilin Province should pay close  
26 attention and publicize the health damage caused by short sleep durations.  
27  
28  
29  
30  
31  
32

## 33 **Acknowledgments**

34  
35 The contributions of all of the participants, patient advisers and interviewers are gratefully  
36 acknowledged. This study was supported by grants from the Center for Disease Prevention  
37 and Control in Jilin Province.  
38  
39  
40

## 41 **Data sharing statement**

42  
43 The survey was implemented by School of Public Health, Jilin University and Jilin Center for  
44 Disease Control and Prevention in Jilin Province in 2012. According to relevant regulations,  
45 the data can not be shared.  
46  
47  
48

## 49 **Funding**

50  
51 This study was supported by a competitive grant from the Scientific Research Foundation of  
52 the Health Bureau of Jilin Province, China (grant number: 2011Z116).  
53  
54  
55  
56  
57  
58  
59  
60



## Author Contributions

Formal analysis, Meng Li; Investigation, Bo Li; Methodology, Bo Li; Writing – original draft, Meng Li; Writing – review & editing, Meng Li, Shoumeng Yan, Shan Jiang, Xiaoyu Ma and Tianyu Gao.

## Conflicts of Interest

The authors declare no conflict of interest.

## References

1. Aronow WS. Hypertension guidelines. *Hypertension (Dallas, Tex : 1979)* 2011;58(3):347-8. doi: 10.1161/hypertensionaha.111.177147 [published Online First: 2011/07/20]
2. Poulter NR, Prabhakaran D, Caulfield M. Hypertension. *Lancet (London, England)* 2015;386(9995):801-12. doi: 10.1016/s0140-6736(14)61468-9 [published Online First: 2015/04/03]
3. Kearney PM, Whelton M, Reynolds K, et al. Global burden of hypertension: analysis of worldwide data. *Lancet (London, England)* 2005;365(9455):217-23. doi: 10.1016/s0140-6736(05)17741-1 [published Online First: 2005/01/18]
4. Lim SS, Vos T, Flaxman AD, et al. A comparative risk assessment of burden of disease and injury attributable to 67 risk factors and risk factor clusters in 21 regions, 1990-2010: a systematic analysis for the Global Burden of Disease Study 2010. *Lancet (London, England)* 2012;380(9859):2224-60. doi: 10.1016/s0140-6736(12)61766-8 [published Online First: 2012/12/19]
5. Nwankwo T, Yoon SS, Burt V, et al. Hypertension among adults in the United States: National Health and Nutrition Examination Survey, 2011-2012. *NCHS data brief* 2013(133):1-8. [published Online First: 2013/11/01]
6. Global, regional, and national comparative risk assessment of 79 behavioural, environmental and occupational, and metabolic risks or clusters of risks, 1990-2015: a systematic analysis for the Global Burden of Disease Study 2015. *Lancet (London, England)* 2016;388(10053):1659-724. doi: 10.1016/s0140-6736(16)31679-8 [published Online First: 2016/10/14]
7. Chobanian AV, Bakris GL, Black HR, et al. Seventh report of the Joint National Committee on Prevention, Detection, Evaluation, and Treatment of High Blood Pressure. *Hypertension (Dallas, Tex : 1979)* 2003;42(6):1206-52. doi: 10.1161/01.HYP.0000107251.49515.c2 [published Online First: 2003/12/06]
8. St-Onge MP, Grandner MA, Brown D, et al. Sleep Duration and Quality: Impact on Lifestyle Behaviors and Cardiometabolic Health: A Scientific Statement From the American Heart Association. *Circulation* 2016;134(18):e367-e86. doi: 10.1161/cir.0000000000000444 [published Online First: 2016/11/02]
9. Faraut B, Touchette E, Gamble H, et al. Short sleep duration and increased risk of hypertension: a primary care medicine investigation. *Journal of hypertension* 2012;30(7):1354-63. doi: 10.1097/HJH.0b013e32835465e5 [published Online First: 2012/05/19]
10. Pepin JL, Borel AL, Tamisier R, et al. Hypertension and sleep: overview of a tight relationship. *Sleep medicine reviews* 2014;18(6):509-19. doi: 10.1016/j.smr.2014.03.003 [published Online First: 2014/05/23]



11. Wang Q, Xi B, Liu M, et al. Short sleep duration is associated with hypertension risk among adults: a systematic review and meta-analysis. *Hypertension research : official journal of the Japanese Society of Hypertension* 2012;35(10):1012-8. doi: 10.1038/hr.2012.91 [published Online First: 2012/07/06]
12. Guo X, Zheng L, Wang J, et al. Epidemiological evidence for the link between sleep duration and high blood pressure: a systematic review and meta-analysis. *Sleep medicine* 2013;14(4):324-32. doi: 10.1016/j.sleep.2012.12.001 [published Online First: 2013/02/12]
13. Gottlieb DJ, Redline S, Nieto FJ, et al. Association of usual sleep duration with hypertension: the Sleep Heart Health Study. *Sleep* 2006;29(8):1009-14. [published Online First: 2006/09/02]
14. Gangwisch JE, Heymsfield SB, Boden-Albala B, et al. Short sleep duration as a risk factor for hypertension: analyses of the first National Health and Nutrition Examination Survey. *Hypertension (Dallas, Tex : 1979)* 2006;47(5):833-9. doi: 10.1161/01.HYP.0000217362.34748.e0 [published Online First: 2006/04/06]
15. Matthews KA, Chang Y, Kravitz HM, et al. Sleep and risk for high blood pressure and hypertension in midlife women: the SWAN (Study of Women's Health Across the Nation) Sleep Study. *Sleep medicine* 2014;15(2):203-8. doi: 10.1016/j.sleep.2013.11.002 [published Online First: 2013/12/24]
16. Sforza E, Saint Martin M, Barthelemy JC, et al. Association of self-reported sleep and hypertension in non-insomniac elderly subjects. *Journal of clinical sleep medicine : JCSM : official publication of the American Academy of Sleep Medicine* 2014;10(9):965-71. doi: 10.5664/jcsm.4026 [published Online First: 2014/08/22]
17. Wang S, Kou C, Liu Y, et al. Rural-urban differences in the prevalence of chronic disease in northeast China. *Asia-Pacific journal of public health* 2015;27(4):394-406. doi: 10.1177/1010539514551200 [published Online First: 2014/09/24]
18. Clinical Guidelines on the Identification, Evaluation, and Treatment of Overweight and Obesity in Adults--The Evidence Report. National Institutes of Health. *Obesity research* 1998;6 Suppl 2:51s-209s. [published Online First: 1998/11/14]
19. Satoh H, Nishihira J, Wada T, et al. The relation between habitual sleep duration and blood pressure values in Japanese male subjects. *Environmental health and preventive medicine* 2013;18(3):215-20. doi: 10.1007/s12199-012-0309-3 [published Online First: 2012/10/23]
20. Fung MM, Peters K, Ancoli-Israel S, et al. Total sleep time and other sleep characteristics measured by actigraphy do not predict incident hypertension in a cohort of community-dwelling older men. *Journal of clinical sleep medicine : JCSM : official publication of the American Academy of Sleep Medicine* 2013;9(6):585-91. doi: 10.5664/jcsm.2756 [published Online First: 2013/06/19]
21. Kuciene R, Dulskiene V. Associations of short sleep duration with prehypertension and hypertension among Lithuanian children and adolescents: a cross-sectional study. *BMC public health* 2014;14:255. doi: 10.1186/1471-2458-14-255 [published Online First: 2014/03/19]
22. Peach H, Gaultney JF, Reeve CL. Sleep characteristics, body mass index, and risk for hypertension in young adolescents. *Journal of youth and adolescence* 2015;44(2):271-84. doi: 10.1007/s10964-014-0149-0 [published Online First: 2014/07/09]
23. Hoevenaar-Blom MP, Spijkerman AM, Kromhout D, et al. Sleep duration and sleep quality in relation to 12-year cardiovascular disease incidence: the MORGEN study. *Sleep* 2011;34(11):1487-92. doi: 10.5665/sleep.1382 [published Online First: 2011/11/02]
24. Knutson KL. Sleep duration and cardiometabolic risk: a review of the epidemiologic evidence. *Best practice*

- 1  
2  
3  
4 & research *Clinical endocrinology & metabolism* 2010;24(5):731-43. doi: 10.1016/j.beem.2010.07.001  
5 [published Online First: 2010/11/30]  
6  
7 25. Gangwisch JE. Epidemiological evidence for the links between sleep, circadian rhythms and metabolism.  
8 *Obesity reviews : an official journal of the International Association for the Study of Obesity* 2009;10  
9 Suppl 2:37-45. doi: 10.1111/j.1467-789X.2009.00663.x [published Online First: 2009/10/29]  
10  
11 26. Meng L, Zheng Y, Hui R. The relationship of sleep duration and insomnia to risk of hypertension incidence: a  
12 meta-analysis of prospective cohort studies. *Hypertension research : official journal of the Japanese*  
13 *Society of Hypertension* 2013;36(11):985-95. doi: 10.1038/hr.2013.70 [published Online First:  
14 2013/09/06]  
15  
16 27. Wang Y, Mei H, Jiang YR, et al. Relationship between Duration of Sleep and Hypertension in Adults: A  
17 Meta-Analysis. *Journal of clinical sleep medicine : JCSM : official publication of the American Academy*  
18 *of Sleep Medicine* 2015;11(9):1047-56. doi: 10.5664/jcsm.5024 [published Online First: 2015/04/24]  
19  
20 28. Choi KM, Lee JS, Park HS, et al. Relationship between sleep duration and the metabolic syndrome: Korean  
21 National Health and Nutrition Survey 2001. *International journal of obesity (2005)* 2008;32(7):1091-7.  
22 doi: 10.1038/ijo.2008.62 [published Online First: 2008/05/14]  
23  
24 29. Lopez-Garcia E, Faubel R, Guallar-Castillon P, et al. Self-reported sleep duration and hypertension in older  
25 Spanish adults. *Journal of the American Geriatrics Society* 2009;57(4):663-8. doi:  
26 10.1111/j.1532-5415.2009.02177.x [published Online First: 2009/04/28]  
27  
28 30. Crowley K. Sleep and sleep disorders in older adults. *Neuropsychology review* 2011;21(1):41-53. doi:  
29 10.1007/s11065-010-9154-6 [published Online First: 2011/01/13]  
30  
31 31. Cappuccio FP, Stranges S, Kandala NB, et al. Gender-specific associations of short sleep duration with  
32 prevalent and incident hypertension: the Whitehall II Study. *Hypertension (Dallas, Tex : 1979)*  
33 2007;50(4):693-700. doi: 10.1161/hypertensionaha.107.095471 [published Online First: 2007/09/06]  
34  
35 32. Stranges S, Dorn JM, Cappuccio FP, et al. A population-based study of reduced sleep duration and  
36 hypertension: the strongest association may be in premenopausal women. *Journal of hypertension*  
37 2010;28(5):896-902. doi: 10.1097/HJH.0b013e328335d076 [published Online First: 2009/12/31]  
38  
39 33. Baldwin CM, Kapur VK, Holberg CJ, et al. Associations between gender and measures of daytime  
40 somnolence in the Sleep Heart Health Study. *Sleep* 2004;27(2):305-11. [published Online First:  
41 2004/05/06]  
42  
43 34. Somers VK, Dyken ME, Mark AL, et al. Sympathetic-nerve activity during sleep in normal subjects. *The New*  
44 *England journal of medicine* 1993;328(5):303-7. doi: 10.1056/nejm199302043280502 [published  
45 Online First: 1993/02/04]  
46  
47 35. Fernandez-Mendoza J, Vgontzas AN, Liao D, et al. Insomnia with objective short sleep duration and incident  
48 hypertension: the Penn State Cohort. *Hypertension (Dallas, Tex : 1979)* 2012;60(4):929-35. doi:  
49 10.1161/hypertensionaha.112.193268 [published Online First: 2012/08/16]  
50  
51 36. Spiegelhalter K, Fuchs L, Ladwig J, et al. Heart rate and heart rate variability in subjectively reported  
52 insomnia. *Journal of sleep research* 2011;20(1 Pt 2):137-45. doi: 10.1111/j.1365-2869.2010.00863.x  
53 [published Online First: 2010/07/16]  
54  
55 37. Kario K, Schwartz JE, Pickering TG. Changes of nocturnal blood pressure dipping status in hypertensives by  
56 nighttime dosing of alpha-adrenergic blocker, doxazosin : results from the HALT study. *Hypertension*  
57 *(Dallas, Tex : 1979)* 2000;35(3):787-94. [published Online First: 2000/03/18]  
58  
59 38. Folkow B. "Structural factor" in primary and secondary hypertension. *Hypertension (Dallas, Tex : 1979)*  
60

1  
2  
3  
4  
5  
6  
7  
8  
9  
10  
11  
12  
13  
14  
15  
16  
17  
18  
19  
20  
21  
22  
23  
24  
25  
26  
27  
28  
29  
30  
31  
32  
33  
34  
35  
36  
37  
38  
39  
40  
41  
42  
43  
44  
45  
46  
47  
48  
49  
50  
51  
52  
53  
54  
55  
56  
57  
58  
59  
60

1990;16(1):89-101. [published Online First: 1990/07/01]

39. Franzen PL, Gianaros PJ, Marsland AL, et al. Cardiovascular reactivity to acute psychological stress following sleep deprivation. *Psychosomatic medicine* 2011;73(8):679-82. doi: 10.1097/PSY.0b013e31822ff440 [published Online First: 2011/09/29]

For peer review only

STROBE Statement—Checklist of items that should be included in reports of *cross-sectional studies*

|                              | Item No | Recommendation                                                                                                                                                                                                                                                                                                                                                                 |
|------------------------------|---------|--------------------------------------------------------------------------------------------------------------------------------------------------------------------------------------------------------------------------------------------------------------------------------------------------------------------------------------------------------------------------------|
| <b>Title and abstract</b>    | 1       | (a) Indicate the study's design with a commonly used term in the title or the abstract (page 1)<br>(b) Provide in the abstract an informative and balanced summary of what was done and what was found (page 2-3)                                                                                                                                                              |
| <b>Introduction</b>          |         |                                                                                                                                                                                                                                                                                                                                                                                |
| Background/rationale         | 2       | Explain the scientific background and rationale for the investigation being reported (page 3-4)                                                                                                                                                                                                                                                                                |
| Objectives                   | 3       | State specific objectives, including any prespecified hypotheses (page 4)                                                                                                                                                                                                                                                                                                      |
| <b>Methods</b>               |         |                                                                                                                                                                                                                                                                                                                                                                                |
| Study design                 | 4       | Present key elements of study design early in the paper (page 4)                                                                                                                                                                                                                                                                                                               |
| Setting                      | 5       | Describe the setting, locations, and relevant dates, including periods of recruitment, exposure, follow-up, and data collection (page 4-5)                                                                                                                                                                                                                                     |
| Participants                 | 6       | (a) Give the eligibility criteria, and the sources and methods of selection of participants (page 4)                                                                                                                                                                                                                                                                           |
| Variables                    | 7       | Clearly define all outcomes, exposures, predictors, potential confounders, and effect modifiers. Give diagnostic criteria, if applicable (page 4-5)                                                                                                                                                                                                                            |
| Data sources/<br>measurement | 8*      | For each variable of interest, give sources of data and details of methods of assessment (measurement). Describe comparability of assessment methods if there is more than one group (page 4-5)                                                                                                                                                                                |
| Bias                         | 9       | Describe any efforts to address potential sources of bias (page 4)                                                                                                                                                                                                                                                                                                             |
| Study size                   | 10      | Explain how the study size was arrived at (page 4)                                                                                                                                                                                                                                                                                                                             |
| Quantitative variables       | 11      | Explain how quantitative variables were handled in the analyses. If applicable, describe which groupings were chosen and why (page 6)                                                                                                                                                                                                                                          |
| Statistical methods          | 12      | (a) Describe all statistical methods, including those used to control for confounding (page 6)<br>(b) Describe any methods used to examine subgroups and interactions (page 6)<br>(c) Explain how missing data were addressed (page 6)<br>(d) If applicable, describe analytical methods taking account of sampling strategy (page 6)<br>(e) Describe any sensitivity analyses |
| <b>Results</b>               |         |                                                                                                                                                                                                                                                                                                                                                                                |
| Participants                 | 13*     | (a) Report numbers of individuals at each stage of study—eg numbers potentially eligible, examined for eligibility, confirmed eligible, included in the study, completing follow-up, and analysed (page 6-7)<br>(b) Give reasons for non-participation at each stage<br>(c) Consider use of a flow diagram                                                                     |
| Descriptive data             | 14*     | (a) Give characteristics of study participants (eg demographic, clinical, social) and information on exposures and potential confounders (page 6-7)<br>(b) Indicate number of participants with missing data for each variable of interest                                                                                                                                     |
| Outcome data                 | 15*     | Report numbers of outcome events or summary measures (page 6-9)                                                                                                                                                                                                                                                                                                                |
| Main results                 | 16      | (a) Give unadjusted estimates and, if applicable, confounder-adjusted estimates and their precision (eg, 95% confidence interval). Make clear which confounders were adjusted for and why they were included (page 7-8)<br>(b) Report category boundaries when continuous variables were categorized (page 7-                                                                  |

|                          |    |                                                                                                                                                                                         |
|--------------------------|----|-----------------------------------------------------------------------------------------------------------------------------------------------------------------------------------------|
|                          |    | 10)                                                                                                                                                                                     |
|                          |    | (c) If relevant, consider translating estimates of relative risk into absolute risk for a meaningful time period                                                                        |
| Other analyses           | 17 | Report other analyses done—eg analyses of subgroups and interactions, and sensitivity analyses (page 9-10)                                                                              |
| <b>Discussion</b>        |    |                                                                                                                                                                                         |
| Key results              | 18 | Summarise key results with reference to study objectives (page 10-11)                                                                                                                   |
| Limitations              | 19 | Discuss limitations of the study, taking into account sources of potential bias or imprecision. Discuss both direction and magnitude of any potential bias (page 12)                    |
| Interpretation           | 20 | Give a cautious overall interpretation of results considering objectives, limitations, multiplicity of analyses, results from similar studies, and other relevant evidence (page 10-12) |
| Generalisability         | 21 | Discuss the generalisability (external validity) of the study results (page 10-12)                                                                                                      |
| <b>Other information</b> |    |                                                                                                                                                                                         |
| Funding                  | 22 | Give the source of funding and the role of the funders for the present study and, if applicable, for the original study on which the present article is based                           |

\*Give information separately for exposed and unexposed groups.

**Note:** An Explanation and Elaboration article discusses each checklist item and gives methodological background and published examples of transparent reporting. The STROBE checklist is best used in conjunction with this article (freely available on the Web sites of PLoS Medicine at <http://www.plosmedicine.org/>, Annals of Internal Medicine at <http://www.annals.org/>, and Epidemiology at <http://www.epidem.com/>). Information on the STROBE Initiative is available at [www.strobe-statement.org](http://www.strobe-statement.org).

# BMJ Open

## Relationship between sleep duration and hypertension in Northeast China: a cross-sectional study

|                                 |                                                                                                                                                                                                                                                                                                                                                                                                                                                                                                                                                                                 |
|---------------------------------|---------------------------------------------------------------------------------------------------------------------------------------------------------------------------------------------------------------------------------------------------------------------------------------------------------------------------------------------------------------------------------------------------------------------------------------------------------------------------------------------------------------------------------------------------------------------------------|
| Journal:                        | <i>BMJ Open</i>                                                                                                                                                                                                                                                                                                                                                                                                                                                                                                                                                                 |
| Manuscript ID                   | bmjopen-2018-023916.R2                                                                                                                                                                                                                                                                                                                                                                                                                                                                                                                                                          |
| Article Type:                   | Research                                                                                                                                                                                                                                                                                                                                                                                                                                                                                                                                                                        |
| Date Submitted by the Author:   | 20-Nov-2018                                                                                                                                                                                                                                                                                                                                                                                                                                                                                                                                                                     |
| Complete List of Authors:       | Li, Meng; Jilin University School of Public Health, Department of Epidemiology and Biostatistics<br>Yan, shoumeng; Jilin University School of Public Health, Department of Epidemiology and Biostatistics<br>Jiang, Shan; Jilin University School of Public Health, Department of Epidemiology and Biostatistics<br>Ma, Xiaoyu; Jilin University School of Public Health, Department of Epidemiology and Biostatistics<br>Gao, Tianyu; Jilin University School of Public Health, Department of Epidemiology and Biostatistics; Changchun Health Supervision Institute<br>Li, Bo |
| <b>Primary Subject Heading</b>: | Epidemiology                                                                                                                                                                                                                                                                                                                                                                                                                                                                                                                                                                    |
| Secondary Subject Heading:      | Public health                                                                                                                                                                                                                                                                                                                                                                                                                                                                                                                                                                   |
| Keywords:                       | Hypertension < CARDIOLOGY, EPIDEMIOLOGY, sleep                                                                                                                                                                                                                                                                                                                                                                                                                                                                                                                                  |
|                                 |                                                                                                                                                                                                                                                                                                                                                                                                                                                                                                                                                                                 |

SCHOLARONE™  
Manuscripts

# Relationship between sleep duration and hypertension in Northeast China: a cross-sectional study

Meng Li<sup>1</sup>, Shoumeng Yan<sup>1</sup>, Shan Jiang<sup>1</sup>, Xiaoyu Ma<sup>1</sup>, Tianyu Gao<sup>1,2</sup> and Bo Li<sup>1,\*</sup>

<sup>1</sup> Department of Epidemiology and Biostatistics, School of Public Health, Jilin University, Changchun 130021, China; E-Mails: lm17@mails.jlu.edu.cn (M.L.); yansm17@mails.jlu.edu.cn(S.Y.); jiangs17@mails.jlu.edu.cn(S.J.); maxy17@mails.jlu.edu.cn(X.M.);

<sup>2</sup> Changchun Health Supervision Institute, Changchun, 130000, China; E-Mail: gaoty17@mails.jlu.edu.cn (T.G.);

\* Correspondence to: Bo Li; Postal address: No.1163 Xinmin Street, Changchun City, Jilin Province, China. E-mail: li\_bo@jlu.edu.cn; Tel.: +86-431-85619451.

**Keywords:** sleep; hypertension; epidemiology;

**Word count:** 2704 words (excluding title page, references, figures and tables)

## Abstract

**Objectives:** Previous studies have reported that sleep duration might increase the risk of hypertension. However, the results have been conflicting. We investigated whether sleep duration is independently associated with hypertension. We aimed to assess the relationship between sleep duration and hypertension in a population-based cross-sectional study.

**Methods:** In this study, we used multistage stratified cluster sampling. A total of 19 407 adults aged 18-79 years were enrolled in the study. The participants were divided into three groups (<7 h/d, 7-8 h/d, >8 h/d) according to self-reported sleep duration. Hypertension was defined as systolic blood pressure (SBP)  $\geq 140$  mmHg or diastolic blood pressure (DBP)  $\geq 90$  mmHg or the use of anti-hypertensive medications. Univariate and multivariate logistic regressions were performed to determine the association between hypertension and sleep duration adjusted for socio-demographic, BMI, and lifestyle covariates.

**Results:** The overall prevalence of hypertension was 32.6%. Among participants aged 18-44 years, individuals sleeping less than 7 hours per day had a higher risk of hypertension (OR=1.24, 95%CI:1.05-1.46), compared with those who slept 7-8 hours per day. There were no significant associations between sleep duration and hypertension among the total sample, middle-aged adults (45-59 years), or older adults (60-79 years).

**Conclusions:** Our study demonstrates that short sleep duration was significantly associated with hypertension among people aged 18-44 years in Northeast China.

## Article Summary

### Strengths and limitations of this study

- A multistage, stratified random cluster sampling design was used to obtain a large, representative sample of the Jilin population.
- There were excellent response rates to the sleep duration questions and the hypertension questions and measurements.
- A broad range of covariates were controlled for in the analysis, including age, sex, education, marital status, income, occupation, BMI, drinking, smoking, salt intake, and



1  
2  
3  
4  
5 exercise.

- 6 ● The limitation of this study is that the sleep duration obtained from the questionnaire  
7 was subjective and may differ from precisely measured sleep duration.  
8  
9

## 10 11 **Introduction**

12  
13 In many countries, the diagnosis of hypertension is based on a systolic blood pressure(SBP)  
14 of at least 140 mmHg, a diastolic blood pressure(DBP) of at least 90 mmHg, or both.<sup>1 2</sup> In  
15 2000, the overall prevalence of hypertension was 26.4% worldwide.<sup>3</sup> In 2010, hypertension  
16 was the leading single contributor to global mortality, being responsible for more than 9  
17 million deaths.<sup>4</sup> Data from National Health and Nutrition Examination Survey (NHANES) in  
18 2011-2012 estimated the overall prevalence of hypertension among U.S. adults aged 18 and  
19 over was 29.1% ( 29.7% men and 28.5% women).<sup>5</sup> The latest data from the Global Burden of  
20 Disease Study in 2015 showed that high systolic blood pressure continues to be the largest  
21 contributor to global disability-adjusted life-years (DALYs), causing 211.8 million global  
22 DALYs each year.<sup>6</sup> According to a previous study,<sup>7</sup> hypertension is a major risk factor for  
23 cardiovascular disease (CVD), heart attack, heart failure, stroke and kidney disease. Studies  
24 have shown that sleep duration is associated with hypertension.<sup>8 9</sup> Short sleep duration,  
25 usually defined as less than 7 h, 6 h or 5 hours per night,<sup>10</sup> was associated with an increased  
26 risk of prevalent hypertension.<sup>11 12</sup> The relationship between self-reported sleep duration and  
27 hypertension was first reported as a U-shaped association in the Sleep Heart Health Study  
28 (SHHS).<sup>13</sup> In the study, Gottlieb et al. found that sleep duration less than 7 hours per night or  
29 more than 8 hours per night was associated with an increased prevalence of hypertension.  
30 The results from the Nation Health and Nutrition Examination Survey (NHANES) also  
31 demonstrated an association between sleep durations of less than 5 hours per night and an  
32 increased risk of hypertension in the same year.<sup>14</sup> However, there are conflicting results. A  
33 community-based 7-site study<sup>15</sup> came to the conclusion that sleep duration was unrelated to  
34 blood pressure cross-sectionally or longitudinally in midlife women. Similarly, a study  
35 among non-insomniac elderly subjects<sup>16</sup> indicated that sleep duration was not associated with  
36 the prevalence of hypertension. Therefore, the relationship between sleep duration and  
37  
38  
39  
40  
41  
42  
43  
44  
45  
46  
47  
48  
49  
50  
51  
52  
53  
54  
55  
56  
57  
58  
59  
60

1  
2  
3  
4  
5 hypertension needs to be further investigated.  
6

7 In this study, we investigated the relationship between self-reported sleep duration and  
8 hypertension among subjects who participated in a representative population-based survey  
9 from the Jilin province in Northeast China. Moreover, the role of age and sex in the  
10 relationship between sleep duration and hypertension was also evaluated.  
11  
12  
13  
14  
15

## 16 **Methods**

### 17 **Study design and population**

18  
19 This study was embedded in the Jilin Provincial Chronic Disease Survey, a population-based  
20 cross-sectional study conducted from June 2012 to August 2012. A multistage stratified  
21 cluster sampling method was used to select a representative sample of community-dwelling  
22 residents who had lived in nine regions of Jilin Province (Changchun, Jilin, Siping, Liaoyuan,  
23 Tonghua, Baishan, Songyuan, Baicheng and Yanbian) for at least six months. The detailed  
24 stratifying process was reported previously.<sup>17</sup> A total of 23 050 individuals were recruited,  
25 and 21 435 of them completed the survey (84.9% response rate). In this study, 2028 subjects  
26 were excluded from the statistical analyses due to missing data on marital status, occupation,  
27 income, height, weight, systolic blood pressure or diastolic blood pressure, yielding a final  
28 sample size of 19 407 subjects. Among the 2028 excluded subjects (1218 males, 809 females),  
29 the mean age was 47.07 years (SD 13.40, range 18-79 years).  
30  
31  
32  
33  
34  
35  
36  
37  
38  
39  
40  
41

42 Ethical approval was obtained by the Ethics Committee of Jilin University School of  
43 Public Health. We adhered to the bioethics principles of the Declaration of Helsinki, and  
44 written informed consent was obtained from all participants.  
45  
46  
47

### 48 **Definition of major variables**

49 After at least 5 minutes of rest, two blood-pressure measurements were made with the  
50 participants in a seated position, using appropriately sized cuffs and calibrated electronic  
51 sphygmomanometers (OMRON-HEM-7200, Omron Corporation, Kyoto, Japan). The mean  
52 of the two blood pressure measurements taken at 2-minute intervals was used in the analyses.  
53  
54  
55  
56  
57 In our study, hypertension was defined as SBP  $\geq$ 140 mmHg or DBP  $\geq$ 90 mmHg or the  
58  
59  
60

1  
2  
3  
4  
5 current use of anti-hypertensive medication.  
6

7 Self-reported sleep duration was assessed by the following question: “On average, how  
8 many hours of actual sleep did you get each day (24 h) during the past month?” The results  
9 were categorized into 3 groups for analysis: <7 , 7-8, and  $\geq 8$  h/d, and we chose the category  
10 of 7-8 h/d as the reference group, in accordance with a previous study.<sup>13</sup>  
11  
12

13 A structured questionnaire was used to collect socio-demographic information of the  
14 participants, and the measured characteristics included gender (male, female), age (18-44,  
15 45-59, 60-79 years), education (elementary, junior, senior, university), marital status (married,  
16 unmarried, separated/divorced, widowed), occupation (manual labour, mental labour,  
17 unemployed, retired), and family monthly income per capita (<1000, 1000-3000, >3000  
18 RMB). The body mass index (BMI) was measured, calculated as weight (kg)/height squared  
19 ( $\text{kg}/\text{m}^2$ ). All participants were categorized as underweight ( $\text{BMI}<18.5 \text{ kg}/\text{m}^2$ ), normal weight  
20 ( $\text{BMI}=18.5$  to  $25 \text{ kg}/\text{m}^2$ ), overweight ( $\text{BMI}=25.0$  to  $30.0 \text{ kg}/\text{m}^2$ ) or obese ( $\text{BMI}>30.0$   
21  $\text{kg}/\text{m}^2$ ).<sup>18</sup> Other variables, including smoking status (yes, no, former), drinking (yes, no), salt  
22 intake (high-salt, light, moderate), and physical exercise (frequently, occasionally, never)  
23 were assessed. A smoker was defined as a person who had smoked at least one cigarette a day  
24 over the past 30 days; a former smoker was defined as a person who had smoked more than  
25 100 cigarettes cumulatively, but had quit smoking or had not reached the current smoking  
26 level at the time of the survey; participants who reported never having smoked 100 cigarettes  
27 were defined as never-smokers. A drinker was defined as a person who consumed an average  
28 of more than one alcoholic drink per week. Based on self-report results, we divided the salt  
29 intake into three categories: high salt, light and moderate. Participants who exercised more  
30 than three times a week were defined as “exercise frequently”; those who exercised one or  
31 two times a week were defined as “exercise occasionally”; and those who usually exercised  
32 less than one time a week were defined as “never exercise”.  
33  
34  
35  
36  
37  
38  
39  
40  
41  
42  
43  
44  
45  
46  
47  
48  
49  
50  
51  
52

### 53 **Statistical analysis**

54 Data were analysed using SPSS software (ver. 24.0; IBM Corp.; Armonk, NY, USA).  $\chi^2$  tests  
55 were used to test the association between hypertension and categorical potentially  
56  
57  
58  
59  
60

1  
2  
3  
4  
5 confounding variables. A *P*-value of less than 0.05 was considered statistically significant.  
6  
7 After preliminary univariate analyses, we used logistic regression models to examine the  
8 effect of sleep duration on the risk of hypertension, and the odds-ratio (OR) and 95%  
9 confidence intervals (CI) were calculated. Four regression models were generated. The first  
10 model (model 1) was generated without adjusting for any covariates. Covariates in the first  
11 adjusted multivariate model (model 2) included age, gender, education, marital status,  
12 occupation, and family per capita monthly income. Model 3 adjusted for factors in model 2  
13 plus BMI. Finally, model 4 was further adjusted for smoking, drinking, salt intake, and  
14 physical exercise. The dependent variable was the presence of hypertension. In addition, we  
15 performed subgroup analysis stratified by age and sex.

### 24 **Patient and Public Involvement**

25  
26 No patients were involved in the design of this study, the specific aims or the research  
27 questions, nor were they involved in the recruitment to and conduct of the study. No patients  
28 were involved in the interpretation of study results or write up of the manuscript. There are  
29 no plans to disseminate the results of the research to study participants.  
30  
31  
32  
33  
34  
35

### 36 **Results**

37  
38 The baseline characteristics of the study population according to sleep duration levels are  
39 presented in Table 1. Of the 19 407 participants in our study (53.0% female; mean age: 47.53  
40 years; SD: 13.13 years; range: 18 to 79 years), the median reported sleep duration of the  
41 study population was 7.00 hours per day, 36.6% of the subjects reported a sleep duration of  
42 less than 7 hours per day, and an average sleep duration of 8 or more hours per day was  
43 reported by 37.8% of the study population. Significant differences were observed between  
44 sleep duration and sex, age, education, marital status, occupation, income, smoking, drinking,  
45 salt intake, exercise, and BMI. Subjects with short sleep durations were slightly older, heavier,  
46 and had a lower level of education than subjects sleeping 7 to 8 hours per day (Table 1). They  
47 were also more likely to be male, smokers, drinkers and have a high-salt diet. Individuals  
48 with more hours of sleep per night were younger and more likely to be non-smokers and  
49  
50  
51  
52  
53  
54  
55  
56  
57  
58  
59  
60

1  
2  
3  
4  
5 non-drinkers.  
6  
7

8 Table 1 Characteristics of the three groups stratified according to sleep duration  
9

| Characteristic    | Group               | Sleep Duration |            |            | $\chi^2$ | P      |
|-------------------|---------------------|----------------|------------|------------|----------|--------|
|                   |                     | <7 h/d         | 7-8 h/d    | >8 h/d     |          |        |
|                   | Numbers of subjects | 7106(36.6)     | 4964(25.6) | 7337(37.8) |          |        |
| Sex               | Male                | 3364(36.9)     | 2406(26.4) | 3348(36.7) | 10.143   | 0.006  |
|                   | Female              | 3742(36.4)     | 2558(24.9) | 3989(38.7) |          |        |
| Age               | 18-44               | 2100(26.5)     | 2148(27.1) | 3683(46.4) | 660.611  | <0.001 |
|                   | 45-59               | 3295(42.9)     | 1940(25.3) | 2440(31.8) |          |        |
|                   | 60-79               | 1711(45.0)     | 876(23.1)  | 1214(31.9) |          |        |
| Education         | Elementary          | 2316(40.0)     | 1362(23.5) | 2111(36.5) | 109.944  | <0.001 |
|                   | Junior              | 1999(35.7)     | 1447(25.8) | 2154(38.5) |          |        |
|                   | Senior              | 1887(38.1)     | 1232(24.9) | 1833(37.0) |          |        |
|                   | University          | 904(29.5)      | 923(30.1)  | 1239(40.4) |          |        |
| Marital Status    | Married             | 6101(36.4)     | 4321(25.7) | 6360(37.9) | 184.756  | <0.001 |
|                   | Unmarried           | 343(25.9)      | 366(27.7)  | 613(46.4)  |          |        |
|                   | Separated/divorced  | 180(49.8)      | 75(20.8)   | 106(29.4)  |          |        |
|                   | Widowed             | 482(51.2)      | 202(21.4)  | 258(27.4)  |          |        |
| Occupation        | Manual labor        | 3241(35.4)     | 2294(25.1) | 3622(39.5) | 172.040  | <0.001 |
|                   | Mental labor        | 2071(33.5)     | 1653(26.7) | 2461(39.8) |          |        |
|                   | Unemployed          | 741(40.9)      | 450(24.9)  | 618(34.2)  |          |        |
|                   | Retired             | 1053(46.7)     | 567(25.1)  | 636(28.2)  |          |        |
| Income(RMB)       | <1000               | 3032(38.2)     | 1927(24.2) | 2990(37.6) | 29.632   | <0.001 |
|                   | 1000-3000           | 3452(36.2)     | 2503(26.3) | 3570(37.5) |          |        |
|                   | >3000               | 622(32.2)      | 534(27.6)  | 777(40.2)  |          |        |
| Smoking           | Never               | 4094(34.5)     | 3061(25.8) | 4717(39.7) | 69.354   | <0.001 |
|                   | Yes                 | 2375(39.8)     | 1503(25.2) | 2092(35.0) |          |        |
|                   | Ever                | 637(40.7)      | 400(25.6)  | 528(33.7)  |          |        |
| Drinking          | No                  | 4786(35.9)     | 3391(25.4) | 5163(38.7) | 15.863   | <0.001 |
|                   | Yes                 | 2320(38.3)     | 1573(25.9) | 2174(35.8) |          |        |
| Salt intake       | Moderate            | 2283(34.0)     | 1767(26.3) | 2670(39.7) | 31.938   | <0.001 |
|                   | High-salt           | 2777(37.9)     | 1856(25.3) | 2699(36.8) |          |        |
|                   | Light               | 2046(38.2)     | 1341(25.0) | 1968(36.8) |          |        |
| Physical exercise | Never               | 3326(36.7)     | 2249(24.9) | 3477(38.4) | 112.339  | <0.001 |
|                   | Frequently          | 2342(40.4)     | 1522(26.2) | 1936(33.4) |          |        |
|                   | Occasionally        | 1438(31.6)     | 1193(26.2) | 1924(42.2) |          |        |
| BMI               | Normal weight       | 3915(35.8)     | 2797(25.6) | 4223(38.6) | 39.105   | <0.001 |
|                   | Underweight         | 260(30.7)      | 205(24.2)  | 381(45.1)  |          |        |
|                   | Overweight          | 2462(38.5)     | 1648(25.8) | 2286(35.7) |          |        |
|                   | Obese               | 469(38.2)      | 314(25.5)  | 447(36.3)  |          |        |

The characteristics of the study population stratified by hypertension are shown in table 2. In our study, the overall prevalence of hypertension was 32.6% (37.0% male, 28.6% female). Hypertension was found to be associated with sex, age, education, marital status, occupation, and family monthly income per capita. Additionally, hypertension was associated with smoking, drinking, salt intake, exercise and BMI. As shown in table 2, there was a significant difference between sleep duration and the prevalence of hypertension. Hypertensive subjects were more likely to sleep for shorter durations.

Table 2 Baseline characteristics of the participants stratified by hypertension

| Characteristic | Group               | Hypertension |            | $\chi^2$ | P      | OR    | 95%CI         |
|----------------|---------------------|--------------|------------|----------|--------|-------|---------------|
|                |                     | No           | Yes        |          |        |       |               |
|                | Numbers of subjects | 13087(67.4)  | 6320(32.6) |          |        |       |               |
| Sex            | Male                | 5742(63.0)   | 3376(37.0) | 155.787  | <0.001 | 1.000 | -             |
|                | Female              | 7345(71.4)   | 2944(28.6) |          |        | 0.682 | (0.642-0.724) |
| Age            | 18-44               | 6608(83.3)   | 1323(16.7) | 1181.906 | <0.001 | 1.000 | -             |
|                | 45-59               | 4722(61.5)   | 2953(38.5) |          |        | 3.124 | (2.898-3.366) |
|                | 60-79               | 1757(46.2)   | 2044(53.8) |          |        | 5.811 | (5.327-6.338) |
| Education      | Elementary          | 3509(60.6)   | 2280(39.4) | 282.324  | <0.001 | 1.000 | -             |
|                | Junior              | 3779(67.5)   | 1821(32.5) |          |        | 0.742 | (0.687-0.801) |
|                | Senior              | 3408(68.8)   | 1544(31.2) |          |        | 0.697 | (0.644-0.755) |
|                | University          | 2391(78.0)   | 675(22.0)  |          |        | 0.434 | (0.393-0.480) |
| Marital Status | Married             | 11201(66.7)  | 5581(33.3) | 366.705  | <0.001 | 1.000 | -             |
|                | Unmarried           | 1157(87.5)   | 165(12.5)  |          |        | 0.286 | (0.242-0.338) |
|                | Separated/divorced  | 251(69.5)    | 110(30.5)  |          |        | 0.880 | (0.701-1.103) |
|                | Widowed             | 478(50.7)    | 464(49.3)  |          |        | 1.948 | (1.708-2.222) |
| Occupation     | Manual labor        | 6159(67.3)   | 2988(32.7) | 417.761  | <0.001 | 1.000 | -             |
|                | Mental labor        | 4634(74.9)   | 1551(25.1) |          |        | 0.688 | (0.640-0.739) |
|                | Unemployed          | 1107(61.2)   | 702(38.8)  |          |        | 1.303 | (1.174-1.446) |
|                | Retired             | 1187(52.6)   | 1069(47.4) |          |        | 1.850 | (1.685-2.031) |
| Income(RMB)    | <1000               | 5026(63.2)   | 2923(36.8) | 118.706  | <0.001 | 1.000 | -             |
|                | 1000-3000           | 6641(69.7)   | 2884(30.3) |          |        | 0.747 | (0.701-0.795) |
|                | >3000               | 1420(73.5)   | 513(26.5)  |          |        | 0.621 | (0.556-0.694) |
| Smoking        | Never               | 8293(69.9)   | 3579(30.1) | 145.176  | <0.001 | 1.000 | -             |
|                | Yes                 | 3930(65.8)   | 2040(34.2) |          |        | 1.203 | (1.126-1.285) |
|                | Ever                | 864(55.2)    | 701(44.8)  |          |        | 1.880 | (1.689-2.092) |
| Drinking       | No                  | 9306(69.8)   | 4034(30.2) | 105.100  | <0.001 | 1.000 | -             |
|                | Yes                 | 3781(62.3)   | 2286(37.7) |          |        | 1.395 | (1.309-1.487) |

|                   |               |            |            |          |        |       |                |
|-------------------|---------------|------------|------------|----------|--------|-------|----------------|
| Salt intake       | Moderate      | 4748(70.7) | 1972(29.3) | 50.369   | <0.001 | 1.000 | -              |
|                   | High-salt     | 4784(65.2) | 2548(34.8) |          |        | 1.282 | (1.194-1.3777) |
|                   | Light         | 3555(66.4) | 1800(33.6) |          |        | 1.219 | (1.128-1.317)  |
| Physical exercise | Never         | 6298(69.6) | 2754(30.4) | 283.246  | <0.001 | 1.000 | -              |
|                   | Frequently    | 3430(59.1) | 2370(40.9) |          |        | 1.580 | (1.475-1.693)  |
|                   | Occasionally  | 3359(73.7) | 1196(26.3) |          |        | 0.814 | (0.752-0.882)  |
| BMI               | Normal weight | 6727(76.2) | 2105(23.8) | 1063.588 | <0.001 | 1.000 | -              |
|                   | Underweight   | 752(88.9)  | 94(11.1)   |          |        | 0.359 | (0.288-0.446)  |
|                   | Overweight    | 4211(61.5) | 2639(38.5) |          |        | 2.172 | (2.034-2.318)  |
|                   | Obese         | 1397(48.5) | 1482(51.5) |          |        | 3.142 | (2.787-3.542)  |
| Sleep Duration    | <7 h/d        | 4480(63.0) | 2626(37.0) | 103.575  | <0.001 | 1.000 | -              |
|                   | 7-8 h/d       | 3415(68.8) | 1549(31.2) |          |        | 1.292 | (1.197-1.396)  |
|                   | >8 h/d        | 5192(70.8) | 2145(29.2) |          |        | 0.911 | (0.842-0.985)  |

Table 3 shows the results of multiple logistic regressions performed to test the associations between hypertension and sleep duration adjusted for different potential confounders. For the total sample, participants who slept less than 7 hours per day were significantly more likely to be hypertensive (OR=1.30, 95%CI:1.20-1.40, model 1). After adjusting for socio-demographic variables (OR=1.09, 95%CI:1.00-1.18, model 2), socio-demographic variables and BMI (OR=1.09, 95%CI:1.00-1.18, model 3), a sleep duration of less than 7 hours per day continued to be associated with a higher risk of hypertension. However, the observed association between sleep duration and hypertension was attenuated after adjusting for socio-demographic variables and BMI. Then, after adjusting for socio-demographic variables, BMI, and lifestyle factors, a short sleep duration (less than 7 hours per day) was no longer associated with hypertension (OR=1.08, 95%CI:0.99-1.17, model 4). Among longer sleepers who slept 8 or more hours per day, after adjusting for relevant confounders, we did not find an association between a longer sleep duration and hypertension (OR=0.99, 95%CI:0.91-1.07, model 2; OR=1.00, 95%CI:0.92-1.09, model 3; OR=1.01, 95%CI:0.92-1.10, model 4).

The logistic regression analyses were repeated after stratifying by age (18-44, 45-59, 60-79 years). Subjects between the ages of 18 and 44 years who slept less than 7 hours per day were associated with a higher probability of hypertension after considering different covariates (OR=1.38, 95%CI:1.18-1.61, model 1; OR=1.35, 95%CI:1.15-1.59, model 2; OR=1.27,



95%CI:1.08-1.50, model 3; OR=1.24, 95%CI:1.05-1.46, model 4). However, all four models failed to show any significant associations between sleep duration and hypertension either among subjects between the ages of 45-59 years or among subjects between the ages of 60-79 years.

Repeating the analysis for males and females separately, we found that the unadjusted results were similar between male and female subjects. Subjects who reported sleeping less than 7 hours per day were significantly more likely to be hypertensive than subjects who reported getting 7 to less than 8 hours of sleep per day (males: OR=1.24, 95%CI:1.12-1.39, model 1; females: OR=1.36, 95%CI=1.22-1.51, model 1). When socio-demographic variables, BMI, and lifestyle factors were included in the models, sleep duration was not associated with the risk of hypertension in either male or female subjects.

Table 3 Logistic regression analyses of the relationship between hypertension and categorical sleep duration

| Sleep Duration    | Model 1         | Model 2         | Model 3         | Model 4         |
|-------------------|-----------------|-----------------|-----------------|-----------------|
| <b>Total</b>      |                 |                 |                 |                 |
| <7 h/d            | 1.30(1.20-1.40) | 1.09(1.01-1.18) | 1.09(1.01-1.18) | 1.08(0.99-1.17) |
| 7-8 h/d           | 1.00            | 1.00            | 1.00            | 1.00            |
| ≥8 h/d            | 0.91(0.84-0.99) | 0.99(0.91-1.07) | 1.00(0.92-1.09) | 1.01(0.92-1.10) |
| <b>Ages 18-44</b> |                 |                 |                 |                 |
| <7 h/d            | 1.38(1.18-1.61) | 1.35(1.15-1.59) | 1.27(1.08-1.50) | 1.24(1.05-1.46) |
| 7-8 h/d           | 1.00            | 1.00            | 1.00            | 1.00            |
| ≥8 h/d            | 0.89(0.77-1.03) | 0.95(0.82-1.11) | 0.98(0.84-1.14) | 0.99(0.84-1.15) |
| <b>Ages 45-59</b> |                 |                 |                 |                 |
| <7 h/d            | 1.02(0.91-1.15) | 1.01(0.90-1.14) | 1.03(0.91-1.16) | 1.02(0.91-1.15) |
| 7-8 h/d           | 1.00            | 1.00            | 1.00            | 1.00            |
| ≥8 h/d            | 1.03(0.91-1.17) | 1.03(0.91-1.17) | 1.03(0.91-1.17) | 1.03(0.91-1.17) |
| <b>Ages 60-79</b> |                 |                 |                 |                 |
| <7 h/d            | 1.02(0.87-1.20) | 1.02(0.86-1.20) | 1.03(0.87-1.21) | 1.02(0.86-1.20) |
| 7-8 h/d           | 1.00            | 1.00            | 1.00            | 1.00            |
| ≥8 h/d            | 1.06(0.89-1.26) | 1.07(0.89-1.27) | 1.06(0.89-1.27) | 1.06(0.89-1.27) |
| <b>Male</b>       |                 |                 |                 |                 |
| <7 h/d            | 1.24(1.12-1.39) | 1.08(0.97-1.21) | 1.08(0.97-1.22) | 1.06(0.94-1.19) |
| 7-8 h/d           | 1.00            | 1.00            | 1.00            | 1.00            |
| ≥8 h/d            | 1.00(0.90-1.12) | 1.02(0.91-1.14) | 1.03(0.92-1.16) | 1.04(0.92-1.17) |
| <b>Female</b>     |                 |                 |                 |                 |
| <7 h/d            | 1.36(1.22-1.51) | 1.08(0.96-1.22) | 1.09(0.96-1.23) | 1.09(0.96-1.23) |



|         |                 |                 |                 |                 |
|---------|-----------------|-----------------|-----------------|-----------------|
| 7-8 h/d | 1.00            | 1.00            | 1.00            | 1.00            |
| ≥8 h/d  | 0.84(0.75-0.95) | 1.01(0.89-1.14) | 1.01(0.89-1.14) | 1.01(0.90-1.14) |

Model 1: Unadjusted;

Model 2: Adjusted for age, sex, education, marital status, occupation, income;

Model 3: Adjusted for age, sex, education, marital status, occupation, income, BMI;

Model 4: Adjusted for age, sex, education, marital status, occupation, income, BMI, smoking, drinking, salt intake, physical exercise.

## Discussion

This present study described an analysis of data collected from the Jilin Provincial Chronic Disease Survey, that investigates the relationship between sleep duration and hypertension. In this cross-sectional study, we observed an association between short sleep durations (less than 7 hours per day) and an increased risk of hypertension in young adults (18-44 years). This association was attenuated by the inclusion in the multivariate models of socio-demographic covariates, BMI and lifestyle factors. Compared with the young adults, an association between short sleep duration and hypertension was not found for the middle-aged participants (45-59 years), old participants (60-79 years) or the total sample. Furthermore, no association between sleep duration and hypertension was found when male or female participants were analysed separately.

There have been several studies<sup>19-23</sup> focusing on the relationship between sleep duration and blood pressure. However, this relationship is still controversial. Recent reviews<sup>10 24 25</sup> and meta-analyses<sup>26 27</sup> further clarified the association between short sleep durations and hypertension risk. Two adult meta-analyses<sup>11 12</sup> showed similar results, indicating that short sleep durations were associated with an increased risk of hypertension (OR=1.20, 95%CI:1.09–1.32,  $P<0.001$ ; OR=1.21, 95%CI:1.09–1.34,  $P<0.001$ ). A meta-analysis<sup>26</sup> based on 17 cohort studies demonstrated that short sleep durations increased the risk of hypertension incidence (RR=1.21, 95%CI:1.05–1.40). In fact, the relationship between hypertension and sleep duration may vary by age. In 2008, a Korean study found that short sleep durations were associated with hypertension prevalence only in those younger than 60 years.<sup>28</sup> This was consistent with a Spanish study, which demonstrated that self-reported sleep duration was not associated with hypertension in older adults.<sup>29</sup> In our study, short sleep

1  
2  
3  
4  
5 duration was associated with a higher risk of hypertension in younger adults but not in  
6 middle-aged or elderly individuals. Changes in sleep quality and quantity in later life may be  
7 related to this age-dependent association.<sup>30</sup> Furthermore, participants experiencing  
8 hypertension are probably less likely to survive into their later years. In cross-sectional and  
9 prospective analyses of the Whitehall II Study,<sup>31</sup> short duration of sleep (less than 5 hours per  
10 night) was associated with increased risk of hypertension among women when compared  
11 with the median sleep duration of 7 hours. The result of the Whitehall II Study showed a  
12 gender-specific association between short sleep duration and prevalent and incident  
13 hypertension. However, in our findings, no association between sleep duration and  
14 hypertension was observed in men or women after taking into account potential confounders.  
15 Two factors may explain the differential association of short sleep duration and hypertension  
16 in the male and female groups. First, hormonal influences may play an important role,  
17 especially during the premenopausal period.<sup>32</sup> Second, the Sleep Heart Health Study  
18 indicated that male and female participants answer questions on sleepiness differently.<sup>33</sup>  
19 Therefore, the differential self-reporting of sleep habits of male and female participants may  
20 have an impact on these gender-specific associations.  
21  
22  
23  
24  
25  
26  
27  
28  
29  
30  
31  
32  
33  
34  
35

36 In addition to short sleep duration, sleep disorders such as sleep insomnia<sup>34 35</sup>, obstructive  
37 sleep apnea<sup>36</sup> and other sleep quality problems<sup>37-39</sup> have also been shown to be to be risk  
38 factors for hypertension. Sherwood et al<sup>40</sup> reported that poor sleep quality was associated  
39 with non-dipping blood pressure and the potential mechanism may be heightened  
40 sympathetic activity. Thomas et al<sup>41</sup> proposed other potential mechanisms including  
41 activation of the hypothalamic–pituitary–adrenal (HPA) axis and the stress-diathesis model.  
42 Unfortunately, sleep quality or sleep quality related issues were not recorded in our study,  
43 and we will try to take sleep quality into account in our future investigations.  
44  
45  
46  
47  
48  
49  
50  
51

52 The biological mechanisms underlying the association of short sleep duration and  
53 hypertension are complex and not fully understood. Early data indicated a lower level of  
54 sympathetic-nerve activity and blood pressure during deep non-REM sleep.<sup>42</sup> During  
55 rapid-eye-movement (REM) sleep, there is an increase of sympathetic-nerve activity resulting  
56  
57  
58  
59  
60

1  
2  
3  
4  
5 in surges in blood pressure.<sup>42</sup> Some other studies have also demonstrated that increased  
6 sympathetic activity due to short sleep durations may be associated with hypertension.<sup>34 43 44</sup>  
7  
8 An increased 24-hour haemodynamic load due to a prolonged exposure to short sleep  
9 durations may lead to structural adaptation, such as arterial or left ventricular hypertrophy  
10 remodelling, which gradually leads to the functioning of the entire cardiovascular system  
11 under high-pressure balance.<sup>45</sup> One recent study found that sleep loss might affect blood  
12 pressure reactions to stress, contributing to an increased risk for some cardiovascular  
13 diseases.<sup>46</sup> In addition, disrupted circadian rhythmicity and autonomic balance caused by  
14 short sleep durations may contribute to hypertension.  
15  
16  
17  
18  
19  
20  
21

22  
23 This analysis has several strengths. This study is based on data from a large representative  
24 sample of the Jilin population, and this prospective study minimized selection and recall  
25 biases. There were excellent response rates to the sleep duration questions, hypertension  
26 questions, and measurements. Finally, a broad range of covariates were controlled for in the  
27 analysis, including age, sex, education, marital status, income, occupation, BMI, drinking,  
28 smoking, salt intake, and exercise. A limitation of this study lies in the properties of the  
29 cross-sectional study and the recall bias of self-reported sleep duration.  
30  
31  
32  
33  
34  
35

## 36 **Conclusion**

37  
38 The results of our study revealed a significant association between short sleep duration (less  
39 than 7 hours per day) and hypertension in the sample of young adults indicating that short  
40 sleep duration is an important risk factor for hypertension in young adults. We suggest that  
41 younger adults in the Jilin Province should maintain a sufficient sleep duration. Furthermore,  
42 the Center for Disease Control and Prevention (CDC) of the Jilin Province should pay close  
43 attention and publicize the health damage caused by short sleep durations.  
44  
45  
46  
47  
48  
49

## 50 **Acknowledgments**

51  
52 The contributions of all of the participants, patient advisers and interviewers are gratefully  
53 acknowledged. This study was supported by grants from the Center for Disease Prevention  
54 and Control in Jilin Province.  
55  
56  
57  
58  
59  
60

## Data sharing statement

The survey was implemented by School of Public Health, Jilin University and Jilin Center for Disease Control and Prevention in Jilin Province in 2012. According to relevant regulations, the data can not be shared.

## Funding

This study was supported by a competitive grant from the Scientific Research Foundation of the Health Bureau of Jilin Province, China (grant number: 2011Z116).

## Author Contributions

Formal analysis, Meng Li; Investigation, Bo Li; Methodology, Bo Li; Writing – original draft, Meng Li; Writing – review & editing, Meng Li, Shoumeng Yan, Shan Jiang, Xiaoyu Ma and Tianyu Gao.

## Conflicts of Interest

The authors declare no conflict of interest.

## References

1. Aronow WS. Hypertension guidelines. *Hypertension (Dallas, Tex : 1979)* 2011;58(3):347-8. doi: 10.1161/hypertensionaha.111.177147 [published Online First: 2011/07/20]
2. Poulter NR, Prabhakaran D, Caulfield M. Hypertension. *Lancet (London, England)* 2015;386(9995):801-12. doi: 10.1016/s0140-6736(14)61468-9 [published Online First: 2015/04/03]
3. Kearney PM, Whelton M, Reynolds K, et al. Global burden of hypertension: analysis of worldwide data. *Lancet (London, England)* 2005;365(9455):217-23. doi: 10.1016/s0140-6736(05)17741-1 [published Online First: 2005/01/18]
4. Lim SS, Vos T, Flaxman AD, et al. A comparative risk assessment of burden of disease and injury attributable to 67 risk factors and risk factor clusters in 21 regions, 1990-2010: a systematic analysis for the Global Burden of Disease Study 2010. *Lancet (London, England)* 2012;380(9859):2224-60. doi: 10.1016/s0140-6736(12)61766-8 [published Online First: 2012/12/19]
5. Nwankwo T, Yoon SS, Burt V, et al. Hypertension among adults in the United States: National Health and Nutrition Examination Survey, 2011-2012. *NCHS data brief* 2013(133):1-8. [published Online First: 2013/11/01]
6. Global, regional, and national comparative risk assessment of 79 behavioural, environmental and occupational, and metabolic risks or clusters of risks, 1990-2015: a systematic analysis for the Global Burden of Disease Study 2015. *Lancet (London, England)* 2016;388(10053):1659-724. doi: 10.1016/s0140-6736(16)31679-8 [published Online First: 2016/10/14]
7. Chobanian AV, Bakris GL, Black HR, et al. Seventh report of the Joint National Committee on Prevention,

- 1  
2  
3  
4  
5 Detection, Evaluation, and Treatment of High Blood Pressure. *Hypertension (Dallas, Tex : 1979)*  
6 2003;42(6):1206-52. doi: 10.1161/01.HYP.0000107251.49515.c2 [published Online First: 2003/12/06]  
7  
8 8. St-Onge MP, Grandner MA, Brown D, et al. Sleep Duration and Quality: Impact on Lifestyle Behaviors and  
9 Cardiometabolic Health: A Scientific Statement From the American Heart Association. *Circulation*  
10 2016;134(18):e367-e86. doi: 10.1161/cir.0000000000000444 [published Online First: 2016/11/02]  
11  
12 9. Faraut B, Touchette E, Gamble H, et al. Short sleep duration and increased risk of hypertension: a primary  
13 care medicine investigation. *Journal of hypertension* 2012;30(7):1354-63. doi:  
14 10.1097/HJH.0b013e32835465e5 [published Online First: 2012/05/19]  
15  
16 10. Pepin JL, Borel AL, Tamisier R, et al. Hypertension and sleep: overview of a tight relationship. *Sleep*  
17 *medicine reviews* 2014;18(6):509-19. doi: 10.1016/j.smrv.2014.03.003 [published Online First:  
18 2014/05/23]  
19  
20 11. Wang Q, Xi B, Liu M, et al. Short sleep duration is associated with hypertension risk among adults: a  
21 systematic review and meta-analysis. *Hypertension research : official journal of the Japanese Society*  
22 *of Hypertension* 2012;35(10):1012-8. doi: 10.1038/hr.2012.91 [published Online First: 2012/07/06]  
23  
24 12. Guo X, Zheng L, Wang J, et al. Epidemiological evidence for the link between sleep duration and high blood  
25 pressure: a systematic review and meta-analysis. *Sleep medicine* 2013;14(4):324-32. doi:  
26 10.1016/j.sleep.2012.12.001 [published Online First: 2013/02/12]  
27  
28 13. Gottlieb DJ, Redline S, Nieto FJ, et al. Association of usual sleep duration with hypertension: the Sleep  
29 Heart Health Study. *Sleep* 2006;29(8):1009-14. [published Online First: 2006/09/02]  
30  
31 14. Gangwisch JE, Heymsfield SB, Boden-Albala B, et al. Short sleep duration as a risk factor for hypertension:  
32 analyses of the first National Health and Nutrition Examination Survey. *Hypertension (Dallas, Tex :*  
33 *1979)* 2006;47(5):833-9. doi: 10.1161/01.HYP.0000217362.34748.e0 [published Online First:  
34 2006/04/06]  
35  
36 15. Matthews KA, Chang Y, Kravitz HM, et al. Sleep and risk for high blood pressure and hypertension in midlife  
37 women: the SWAN (Study of Women's Health Across the Nation) Sleep Study. *Sleep medicine*  
38 2014;15(2):203-8. doi: 10.1016/j.sleep.2013.11.002 [published Online First: 2013/12/24]  
39  
40 16. Sforza E, Saint Martin M, Barthelemy JC, et al. Association of self-reported sleep and hypertension in  
41 non-insomniac elderly subjects. *Journal of clinical sleep medicine : JCSM : official publication of the*  
42 *American Academy of Sleep Medicine* 2014;10(9):965-71. doi: 10.5664/jcsm.4026 [published Online  
43 First: 2014/08/22]  
44  
45 17. Wang S, Kou C, Liu Y, et al. Rural-urban differences in the prevalence of chronic disease in northeast China.  
46 *Asia-Pacific journal of public health* 2015;27(4):394-406. doi: 10.1177/1010539514551200 [published  
47 Online First: 2014/09/24]  
48  
49 18. Clinical Guidelines on the Identification, Evaluation, and Treatment of Overweight and Obesity in  
50 Adults--The Evidence Report. National Institutes of Health. *Obesity research* 1998;6 Suppl 2:51s-209s.  
51 [published Online First: 1998/11/14]  
52  
53 19. Satoh H, Nishihira J, Wada T, et al. The relation between habitual sleep duration and blood pressure values  
54 in Japanese male subjects. *Environmental health and preventive medicine* 2013;18(3):215-20. doi:  
55 10.1007/s12199-012-0309-3 [published Online First: 2012/10/23]  
56  
57 20. Fung MM, Peters K, Ancoli-Israel S, et al. Total sleep time and other sleep characteristics measured by  
58 actigraphy do not predict incident hypertension in a cohort of community-dwelling older men. *Journal*  
59 *of clinical sleep medicine : JCSM : official publication of the American Academy of Sleep Medicine*  
60

- 2013;9(6):585-91. doi: 10.5664/jcsm.2756 [published Online First: 2013/06/19]
21. Kuciene R, Dulskiene V. Associations of short sleep duration with prehypertension and hypertension among Lithuanian children and adolescents: a cross-sectional study. *BMC public health* 2014;14:255. doi: 10.1186/1471-2458-14-255 [published Online First: 2014/03/19]
  22. Peach H, Gaultney JF, Reeve CL. Sleep characteristics, body mass index, and risk for hypertension in young adolescents. *Journal of youth and adolescence* 2015;44(2):271-84. doi: 10.1007/s10964-014-0149-0 [published Online First: 2014/07/09]
  23. Hoevenaer-Blom MP, Spijkerman AM, Kromhout D, et al. Sleep duration and sleep quality in relation to 12-year cardiovascular disease incidence: the MORGEN study. *Sleep* 2011;34(11):1487-92. doi: 10.5665/sleep.1382 [published Online First: 2011/11/02]
  24. Knutson KL. Sleep duration and cardiometabolic risk: a review of the epidemiologic evidence. *Best practice & research Clinical endocrinology & metabolism* 2010;24(5):731-43. doi: 10.1016/j.beem.2010.07.001 [published Online First: 2010/11/30]
  25. Gangwisch JE. Epidemiological evidence for the links between sleep, circadian rhythms and metabolism. *Obesity reviews : an official journal of the International Association for the Study of Obesity* 2009;10 Suppl 2:37-45. doi: 10.1111/j.1467-789X.2009.00663.x [published Online First: 2009/10/29]
  26. Meng L, Zheng Y, Hui R. The relationship of sleep duration and insomnia to risk of hypertension incidence: a meta-analysis of prospective cohort studies. *Hypertension research : official journal of the Japanese Society of Hypertension* 2013;36(11):985-95. doi: 10.1038/hr.2013.70 [published Online First: 2013/09/06]
  27. Wang Y, Mei H, Jiang YR, et al. Relationship between Duration of Sleep and Hypertension in Adults: A Meta-Analysis. *Journal of clinical sleep medicine : JCSM : official publication of the American Academy of Sleep Medicine* 2015;11(9):1047-56. doi: 10.5664/jcsm.5024 [published Online First: 2015/04/24]
  28. Choi KM, Lee JS, Park HS, et al. Relationship between sleep duration and the metabolic syndrome: Korean National Health and Nutrition Survey 2001. *International journal of obesity (2005)* 2008;32(7):1091-7. doi: 10.1038/ijo.2008.62 [published Online First: 2008/05/14]
  29. Lopez-Garcia E, Faubel R, Guallar-Castillon P, et al. Self-reported sleep duration and hypertension in older Spanish adults. *Journal of the American Geriatrics Society* 2009;57(4):663-8. doi: 10.1111/j.1532-5415.2009.02177.x [published Online First: 2009/04/28]
  30. Crowley K. Sleep and sleep disorders in older adults. *Neuropsychology review* 2011;21(1):41-53. doi: 10.1007/s11065-010-9154-6 [published Online First: 2011/01/13]
  31. Cappuccio FP, Stranges S, Kandala NB, et al. Gender-specific associations of short sleep duration with prevalent and incident hypertension: the Whitehall II Study. *Hypertension (Dallas, Tex : 1979)* 2007;50(4):693-700. doi: 10.1161/hypertensionaha.107.095471 [published Online First: 2007/09/06]
  32. Stranges S, Dorn JM, Cappuccio FP, et al. A population-based study of reduced sleep duration and hypertension: the strongest association may be in premenopausal women. *Journal of hypertension* 2010;28(5):896-902. doi: 10.1097/HJH.0b013e328335d076 [published Online First: 2009/12/31]
  33. Baldwin CM, Kapur VK, Holberg CJ, et al. Associations between gender and measures of daytime somnolence in the Sleep Heart Health Study. *Sleep* 2004;27(2):305-11. [published Online First: 2004/05/06]
  34. Fernandez-Mendoza J, Vgontzas AN, Liao D, et al. Insomnia with objective short sleep duration and incident hypertension: the Penn State Cohort. *Hypertension (Dallas, Tex : 1979)* 2012;60(4):929-35.



- doi: 10.1161/hypertensionaha.112.193268 [published Online First: 2012/08/16]
35. Budhiraja R, Roth T, Hudge DW, et al. Prevalence and polysomnographic correlates of insomnia comorbid with medical disorders. *Sleep* 2011;34(7):859-67. doi: 10.5665/sleep.1114 [published Online First: 2011/07/07]
36. Floras JS. Hypertension and Sleep Apnea. *The Canadian journal of cardiology* 2015;31(7):889-97. doi: 10.1016/j.cjca.2015.05.003 [published Online First: 2015/06/27]
37. Kara B, Tenekeci EG. Sleep Quality and Associated Factors in Older Turkish Adults With Hypertension: A Pilot Study. *Journal of transcultural nursing : official journal of the Transcultural Nursing Society* 2017;28(3):296-305. doi: 10.1177/1043659615623330 [published Online First: 2015/12/30]
38. Fiorentini A, Valente R, Perciaccante A, et al. Sleep's quality disorders in patients with hypertension and type 2 diabetes mellitus. *International journal of cardiology* 2007;114(2):E50-2. doi: 10.1016/j.ijcard.2006.07.213 [published Online First: 2006/10/31]
39. Liu RQ, Qian Z, Trevathan E, et al. Poor sleep quality associated with high risk of hypertension and elevated blood pressure in China: results from a large population-based study. *Hypertension research : official journal of the Japanese Society of Hypertension* 2016;39(1):54-9. doi: 10.1038/hr.2015.98 [published Online First: 2015/09/04]
40. Sherwood A, Routledge FS, Wohlgemuth WK, et al. Blood pressure dipping: ethnicity, sleep quality, and sympathetic nervous system activity. *American journal of hypertension* 2011;24(9):982-8. doi: 10.1038/ajh.2011.87 [published Online First: 2011/06/03]
41. Thomas SJ, Calhoun D. Sleep, insomnia, and hypertension: current findings and future directions. *Journal of the American Society of Hypertension : JASH* 2017;11(2):122-29. doi: 10.1016/j.jash.2016.11.008 [published Online First: 2017/01/23]
42. Somers VK, Dyken ME, Mark AL, et al. Sympathetic-nerve activity during sleep in normal subjects. *The New England journal of medicine* 1993;328(5):303-7. doi: 10.1056/nejm199302043280502 [published Online First: 1993/02/04]
43. Spiegelhalter K, Fuchs L, Ladwig J, et al. Heart rate and heart rate variability in subjectively reported insomnia. *Journal of sleep research* 2011;20(1 Pt 2):137-45. doi: 10.1111/j.1365-2869.2010.00863.x [published Online First: 2010/07/16]
44. Kario K, Schwartz JE, Pickering TG. Changes of nocturnal blood pressure dipping status in hypertensives by nighttime dosing of alpha-adrenergic blocker, doxazosin : results from the HALT study. *Hypertension (Dallas, Tex : 1979)* 2000;35(3):787-94. [published Online First: 2000/03/18]
45. Folkow B. "Structural factor" in primary and secondary hypertension. *Hypertension (Dallas, Tex : 1979)* 1990;16(1):89-101. [published Online First: 1990/07/01]
46. Franzen PL, Gianaros PJ, Marsland AL, et al. Cardiovascular reactivity to acute psychological stress following sleep deprivation. *Psychosomatic medicine* 2011;73(8):679-82. doi: 10.1097/PSY.0b013e31822ff440 [published Online First: 2011/09/29]

STROBE Statement—Checklist of items that should be included in reports of *cross-sectional studies*

|                              | Item No | Recommendation                                                                                                                                                                                                                                                                                                                                                                 |
|------------------------------|---------|--------------------------------------------------------------------------------------------------------------------------------------------------------------------------------------------------------------------------------------------------------------------------------------------------------------------------------------------------------------------------------|
| <b>Title and abstract</b>    | 1       | (a) Indicate the study's design with a commonly used term in the title or the abstract (page 1)<br>(b) Provide in the abstract an informative and balanced summary of what was done and what was found (page 2-3)                                                                                                                                                              |
| <b>Introduction</b>          |         |                                                                                                                                                                                                                                                                                                                                                                                |
| Background/rationale         | 2       | Explain the scientific background and rationale for the investigation being reported (page 3-4)                                                                                                                                                                                                                                                                                |
| Objectives                   | 3       | State specific objectives, including any prespecified hypotheses (page 4)                                                                                                                                                                                                                                                                                                      |
| <b>Methods</b>               |         |                                                                                                                                                                                                                                                                                                                                                                                |
| Study design                 | 4       | Present key elements of study design early in the paper (page 4)                                                                                                                                                                                                                                                                                                               |
| Setting                      | 5       | Describe the setting, locations, and relevant dates, including periods of recruitment, exposure, follow-up, and data collection (page 4-5)                                                                                                                                                                                                                                     |
| Participants                 | 6       | (a) Give the eligibility criteria, and the sources and methods of selection of participants (page 4)                                                                                                                                                                                                                                                                           |
| Variables                    | 7       | Clearly define all outcomes, exposures, predictors, potential confounders, and effect modifiers. Give diagnostic criteria, if applicable (page 4-5)                                                                                                                                                                                                                            |
| Data sources/<br>measurement | 8*      | For each variable of interest, give sources of data and details of methods of assessment (measurement). Describe comparability of assessment methods if there is more than one group (page 4-5)                                                                                                                                                                                |
| Bias                         | 9       | Describe any efforts to address potential sources of bias (page 4)                                                                                                                                                                                                                                                                                                             |
| Study size                   | 10      | Explain how the study size was arrived at (page 4)                                                                                                                                                                                                                                                                                                                             |
| Quantitative variables       | 11      | Explain how quantitative variables were handled in the analyses. If applicable, describe which groupings were chosen and why (page 6)                                                                                                                                                                                                                                          |
| Statistical methods          | 12      | (a) Describe all statistical methods, including those used to control for confounding (page 6)<br>(b) Describe any methods used to examine subgroups and interactions (page 6)<br>(c) Explain how missing data were addressed (page 6)<br>(d) If applicable, describe analytical methods taking account of sampling strategy (page 6)<br>(e) Describe any sensitivity analyses |
| <b>Results</b>               |         |                                                                                                                                                                                                                                                                                                                                                                                |
| Participants                 | 13*     | (a) Report numbers of individuals at each stage of study—eg numbers potentially eligible, examined for eligibility, confirmed eligible, included in the study, completing follow-up, and analysed (page 6-7)<br>(b) Give reasons for non-participation at each stage<br>(c) Consider use of a flow diagram                                                                     |
| Descriptive data             | 14*     | (a) Give characteristics of study participants (eg demographic, clinical, social) and information on exposures and potential confounders (page 6-7)<br>(b) Indicate number of participants with missing data for each variable of interest                                                                                                                                     |
| Outcome data                 | 15*     | Report numbers of outcome events or summary measures (page 6-9)                                                                                                                                                                                                                                                                                                                |
| Main results                 | 16      | (a) Give unadjusted estimates and, if applicable, confounder-adjusted estimates and their precision (eg, 95% confidence interval). Make clear which confounders were adjusted for and why they were included (page 7-8)<br>(b) Report category boundaries when continuous variables were categorized (page 7-                                                                  |



|                          |    |                                                                                                                                                                                         |
|--------------------------|----|-----------------------------------------------------------------------------------------------------------------------------------------------------------------------------------------|
|                          |    | 10)                                                                                                                                                                                     |
|                          |    | (c) If relevant, consider translating estimates of relative risk into absolute risk for a meaningful time period                                                                        |
| Other analyses           | 17 | Report other analyses done—eg analyses of subgroups and interactions, and sensitivity analyses (page 9-10)                                                                              |
| <b>Discussion</b>        |    |                                                                                                                                                                                         |
| Key results              | 18 | Summarise key results with reference to study objectives (page 10-11)                                                                                                                   |
| Limitations              | 19 | Discuss limitations of the study, taking into account sources of potential bias or imprecision. Discuss both direction and magnitude of any potential bias (page 12)                    |
| Interpretation           | 20 | Give a cautious overall interpretation of results considering objectives, limitations, multiplicity of analyses, results from similar studies, and other relevant evidence (page 10-12) |
| Generalisability         | 21 | Discuss the generalisability (external validity) of the study results (page 10-12)                                                                                                      |
| <b>Other information</b> |    |                                                                                                                                                                                         |
| Funding                  | 22 | Give the source of funding and the role of the funders for the present study and, if applicable, for the original study on which the present article is based                           |

\*Give information separately for exposed and unexposed groups.

**Note:** An Explanation and Elaboration article discusses each checklist item and gives methodological background and published examples of transparent reporting. The STROBE checklist is best used in conjunction with this article (freely available on the Web sites of PLoS Medicine at <http://www.plosmedicine.org/>, Annals of Internal Medicine at <http://www.annals.org/>, and Epidemiology at <http://www.epidem.com/>). Information on the STROBE Initiative is available at [www.strobe-statement.org](http://www.strobe-statement.org).
